# Supplementary material for: Naturally Inspired Peptide Leads: Alanine Scanning Reveals an Actin‐Targeting Thiazole Analogue of Bisebromoamide
Source: PubMed Central journal article supplement (PMC5096027; doi:10.1002/cbic.201600257), 2016-08-05
Supplement: CBIC-17-1621-s001.pdf [file CBIC-17-1621-s001.pdf]

# CHEMBIOCHEM

## Supporting Information

### **Naturally Inspired Peptide Leads: Alanine Scanning Reveals an Actin-Targeting Thiazole Analogue of Bisbromoamide**

Heather J. Johnston,<sup>[a]</sup> Sarah K. Boys,<sup>[a]</sup> Ashraff Makda,<sup>[b]</sup> Neil O. Carragher,<sup>[b]</sup> and Alison N. Hulme<sup>\*[a]</sup>

cbic\_201600257\_sm\_miscellaneous\_information.pdf

## Supporting Information

| Page | Section | Title                                                                         |
|------|---------|-------------------------------------------------------------------------------|
| S1   | 1.1     | General Synthetic Methods                                                     |
| S2   | 1.2     | Synthesis of Opp Fragment                                                     |
| S3   | 1.3     | Synthesis of 4-MeProTz Fragment                                               |
| S5   | 1.4     | Synthesis of MMe-D-BrTyr Fragment                                             |
| S6   | 1.5     | SPPS – Rink Amide Resin                                                       |
| S8   | 1.6     | Spectroscopic data for Tz-BBA analogues <b>Bis1-6</b>                         |
| S32  | 1.7     | Data for High-Content Imaging Assays inc. Figure S1.                          |
| S33  | 1.8     | Data for Reverse Phase Protein Microarray Assays inc. Table S1 and Figure S2. |
| S36  | 1.9     | References                                                                    |

Primary data files for this work can be found at: <http://dx.doi.org/10.7488/ds/1417>

### 1.1 General Synthetic Methods

All non-aqueous reactions were carried out under an atmosphere of nitrogen using oven-dried glassware that was cooled in a desiccator prior to use. Unless otherwise noted, starting materials and reagents were obtained from commercial suppliers and were used without further purification. Toluene, THF, CH<sub>2</sub>Cl<sub>2</sub>, and Et<sub>2</sub>O were dried and purified by passage through activated alumina columns using a Glass Contour Solvent Purification System. *N,N*-Diethylaniline and Et<sub>3</sub>N were distilled from calcium hydride and stored over molecular sieves under a nitrogen atmosphere. Saturated aqueous solutions of inorganic salts are represented as (volume, sat aq). <sup>1</sup>H and <sup>13</sup>C NMR spectra were obtained on Bruker instruments at the stated frequency. Infra-red spectra were recorded neat on Shimadzu IRAffinity-1 unless otherwise stated. Electrospray (ESI) and electron ionisation (EI) mass spectra were obtained on a Kratos MS50TC mass spectrometer. Melting points were determined on a Gallenkamp Electrothermal Melting Point apparatus and are uncorrected. Flash chromatography was carried out using Merck Kieselgel 60 (Merck 9385) under positive pressure. Eluent compositions are quoted as v/v ratios. Optical rotations were performed on an Optical Activity POLAAR 20 polarimeter. Analytical reverse phase HPLC analysis was performed using either –

**Method A:** An Agilent® 1100 series was used with an Agilent® 1100 series Multiple Wavelength Detector (MWD) (190 to 950 nm). Data were collected and process by Agilent® Chemstation software. The method set used a Phenomenex Gemini® C18 (110 Å) column, 5 µm particle size, 150 × 4.6 mm (length × i.d.). The total run time was 10.0 min at a flow rate of 1.00 mL/min and the column was used at ambient temperature. A binary solvent system, was used; A: H<sub>2</sub>O + 0.1% TFA, B: MeCN + 0.04% TFA. The elution program was a linear gradient from 0.00 min to 6.00 min (95A:5B to 5A:95B), then isocratic from 6.00 min to 9.00 min (5A:95B), before recovery of the initial conditions over 0.05 min and equilibration over 0.95 min.

Or –

**Method B:** A Waters® 600 (100 µL) system was used with a Waters® 996 Photodiode Array detector (200 to 800 nm). Data were collected and processed by Waters™ Empower Pro software. The method used a Phenomenex Luna® C18(2) (100 Å) reverse phase column, 5 µm particle size, 250 × 4.6 mm (length × i.d.). The total run time was 50.0 min at a flow rate of 1.00 mL/min and the column was maintained at 25 °C. A binary solvent system, was used; A: H<sub>2</sub>O + 0.1% TFA, B: MeCN + 0.1% TFA. The elution program was a linear gradient from 0.00 min to 30.0 min (95A:5B to 5A:95B), isocratic from 30.0 min to 35.0 min (5A:95B) before recovery of the initial conditions over 5.0 min and equilibration over 10.0 min.

## 1.2 Experimental Procedures for Synthesis of Opp Fragment

### *tert*-Butyl (2*S*)-2-propanoylpyrrolidine-1-carboxylate **3**

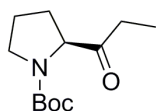

Ethyl magnesium bromide (58.1 mL, 58.1 mmol; 1 M in THF) was added dropwise to a stirred solution of *N*-(*tert*-butoxycarbonyl)-L-proline *N'*-methoxy-*N'*-methylamide **2** (5.00 g, 19.4 mmol) in THF (200 mL) at 0 °C. The reaction mixture was stirred for 3-4 h at rt then the reaction mixture was cooled to 0 °C and NH<sub>4</sub>Cl (50 mL; sat aq) was added dropwise. The reaction mixture was concentrated *in vacuo* and the aqueous phase was extracted with Et<sub>2</sub>O (3 × 200 mL). The combined organic extracts were then washed with brine (200 mL; sat aq) and dried with anhydrous MgSO<sub>4</sub> and concentrated *in vacuo*. The crude product was then purified using column chromatography (DCM) to give the desired product **3** as a colourless solid (4.27 g, 97%). **R<sub>f</sub>**(EtOAc:hexane, 1:4) = 0.22; **[α]<sub>D</sub>** = -73.6 (c 1.10, CHCl<sub>3</sub>), lit<sup>132</sup> -62.7 (c 1.10, CHCl<sub>3</sub>); **mp** 30-31 °C; **IR** (neat, cm<sup>-1</sup>) 1694 (C=O); **<sup>1</sup>H NMR** δ (400 MHz, DMSO-d<sub>6</sub>, 363 K) 4.30 – 4.21 (1H, m, α-CH), 3.43 – 3.31 (2H, m, NCH<sub>2</sub>), 2.49 – 2.36 (2H, m, CH<sub>2</sub>CH<sub>3</sub>), 2.21 – 2.09 (1H, m, α-CHCH<sub>A</sub>H<sub>B</sub>), 1.84 – 1.71 (3H, m, α-CHCH<sub>A</sub>H<sub>B</sub> + CH<sub>2</sub>CH<sub>2</sub>CH<sub>2</sub>), 1.38 (9H, s, C(CH<sub>3</sub>)<sub>3</sub>), 0.99 (3H, t, *J* = 7.3 Hz, CH<sub>2</sub>CH<sub>3</sub>); **<sup>13</sup>C NMR** δ (101 MHz, DMSO-d<sub>6</sub>, 363 K) 209.27 (C), 152.92 (C), 78.29 (C), 64.00 (CH), 46.06 (CH<sub>2</sub>), 30.69 (CH<sub>2</sub>), 28.46 (CH<sub>2</sub>), 27.60 (3 × CH<sub>3</sub>), 22.93 (CH<sub>2</sub>), 6.86 (CH<sub>3</sub>); ***m/z*** (ESI+, MeOH) 250 ([M+Na]<sup>+</sup>, 23%), 130 (100). <sup>1</sup>H spectroscopic data in good agreement with literature.<sup>[1]</sup>

## 1.3 Experimental Procedures for Synthesis of 4-MeProTz Fragment

### 1,2-Di-*tert*-butyl (2*S*,4*S*)-4-methylpyrrolidine-1,2-Dicarboxylate 5

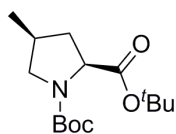

DIPEA (0.090 mL, 0.54 mmol) was added to a stirred solution of 4-methyl proline *tert*-butyl ester **4**<sup>[2]</sup> (0.10 g, 0.54 mmol) in DCM (10 mL) at rt. Di-*tert*-butyl-dicarbonate (0.12 g, 0.54 mmol) was added and the reaction mixture was stirred for ~18 h at rt. The reaction mixture was then washed with HCl (2 × 10 mL; 1 M aq), H<sub>2</sub>O (2 × 10 mL), NaHCO<sub>3</sub> (10 mL; sat aq) and brine (10 mL; sat aq) and dried with anhydrous MgSO<sub>4</sub>. The solvent was removed *in vacuo* to give the desired product **5** as colourless oil in sufficient purity for the next reaction (0.15 g, 95%). **R<sub>f</sub>**(EtOAc:hexane, 1:4) = 0.53; **[α]<sub>D</sub>** = -83.0 (c 1.00, CHCl<sub>3</sub>); **IR** (neat, cm<sup>-1</sup>) 1744 (C=O), 1701 (C=O); **<sup>1</sup>H NMR** δ (500 MHz, DMSO-d<sub>6</sub>, 363 K) 4.04 (1H, t, *J* = 8.0 Hz, α-CH), 3.61 (1H, dd, *J* = 10.2, 7.3 Hz, NCH<sub>X</sub>H<sub>Y</sub>), 2.83 (1H, dd, *J* = 10.2, 9.0 Hz, NCH<sub>X</sub>H<sub>Y</sub>), 2.44 – 2.37 (1H, m, α-CHCH<sub>A</sub>H<sub>B</sub>), 2.25 – 2.14 (1H, m, CHCH<sub>3</sub>), 1.45 – 1.37 (1H, m, α-CHCH<sub>A</sub>H<sub>B</sub>), 1.43 (9H, s, C(CH<sub>3</sub>)<sub>3</sub>), 1.40 (9H, s, C(CH<sub>3</sub>)<sub>3</sub>), 1.01 (3H, d, *J* = 6.7 Hz, CHCH<sub>3</sub>); **<sup>13</sup>C NMR** δ (126 MHz, DMSO-d<sub>6</sub>, 363 K) 171.23 (C), 152.69 (C), 79.67 (C), 78.17 (C), 59.23 (CH), 53.00 (CH<sub>2</sub>), 37.28 (CH<sub>2</sub>), 31.30 (CH), 27.62 (3 × CH<sub>3</sub>), 27.24 (3 × CH<sub>3</sub>), 16.75 (CH<sub>3</sub>); ***m/z*** (ESI+, MeOH) 593 ([2M+Na]<sup>+</sup>, 50%), 308 ([M+Na]<sup>+</sup>, 100), 252 (12); **HRMS** (ESI+, MeOH) [M+Na]<sup>+</sup> found 308.1836, C<sub>15</sub>H<sub>27</sub>NO<sub>4</sub>Na requires 308.1832.

### *tert*-Butyl (2*S*,4*S*)-2-formyl-4-methylpyrrolidine-1-carboxylate 6

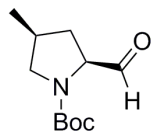

DIBAL (1.3 mL, 1.3 mmol; 1 M in hexanes) was added dropwise over 20 min to a stirred solution of Boc-protected 4-methyl proline *tert*-butyl ester **5** (0.15 g, 0.53 mmol) in DCM (100 mL) at -78 °C. The reaction mixture was stirred for 2 h at -78 °C then MeOH (10 mL) was added dropwise. The reaction mixture was transferred to an ice bath and citric acid (50 mL; 0.5 M aq) was added dropwise with vigorous stirring. The reaction mixture was allowed to return to rt then extracted with EtOAc (2 × 100 mL). The combined organic extracts were then washed with H<sub>2</sub>O (100 mL) and brine (100 mL; sat aq) and dried with anhydrous MgSO<sub>4</sub>. The solvent was removed *in vacuo* and the crude product was then purified using column chromatography (EtOAc:hexane, 1:4) to give the desired product **6** as a colourless oil (0.11 g, 97%). **R<sub>f</sub>** (EtOAc:hexane, 1:4) = 0.31; **[α]<sub>D</sub>** = -60.0 (c 0.10, CHCl<sub>3</sub>); **IR** (neat, cm<sup>-1</sup>) 1736 (C=O), 1690 (C=O); **<sup>1</sup>H NMR** δ (500 MHz, DMSO-d<sub>6</sub>, 363 K) 9.41 (1H, d, *J* = 3.2 Hz, CHO), 4.04 (1H, ddd, *J* = 8.6, 8.0, 3.2 Hz, α-CH), 3.62 (1H, dd, *J* = 10.5, 7.8 Hz, NCH<sub>X</sub>H<sub>Y</sub>), 2.89 (1H, dd, *J* = 10.5, 8.6 Hz, NCH<sub>X</sub>H<sub>Y</sub>), 2.33 – 2.24 (1H, m, CHCH<sub>3</sub>), 2.24 – 2.15 (1H, m, α-CHCH<sub>A</sub>H<sub>B</sub>), 1.53 – 1.45 (1H, m, α-CHCH<sub>A</sub>H<sub>B</sub>), 1.40 (9H, s, C(CH<sub>3</sub>)<sub>3</sub>), 1.01 (3H, d, *J* = 6.5 Hz, CHCH<sub>3</sub>); **<sup>13</sup>C NMR** δ (126 MHz, DMSO-d<sub>6</sub>, 363 K) 199.82 (CH), 153.15 (C), 78.90 (C), 64.60 (CH), 53.15 (CH<sub>2</sub>), 34.30 (CH<sub>2</sub>), 31.51 (CH), 27.55 (3 × CH<sub>3</sub>), 16.62 (CH<sub>3</sub>).

### Methyl (2*R*,4*S*)-2-[(2*S*,4*S*)-1-[(*tert*-butoxy)carbonyl]-4-methylpyrrolidin-2-yl]-1,3-thiazolidine-4-carboxylate 7

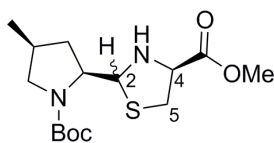

Et<sub>3</sub>N (60 μL, 0.78 mmol) was added dropwise to a stirred solution of Boc-protected 4-methyl proline aldehyde **6** (0.11 g, 0.52 mmol) and L-cysteine methyl ester hydrochloride (0.11 g, 0.65 mmol) in toluene (10 mL) at 0 °C. The reaction mixture was stirred at 0 °C for 1 h then returned to rt and stirred for a further 2 h. The reaction

mixture was filtered, concentrated *in vacuo* and the crude product was then purified using column chromatography (EtOAc:hexane, 1:2) to give the desired product **7** as a colourless oil (0.17 g, 98%). The product was isolated as a mixture of diastereomers which were used directly in the next step. *m/z* (ESI+, MeOH) 353 ([M+Na]<sup>+</sup>, 100%), 331 ([M+H]<sup>+</sup>, 15), 275 (18), 253 (11), 231 (28), 107 (24); **HRMS** (ESI+, MeOH) [M+Na]<sup>+</sup> found 353.1508, C<sub>15</sub>H<sub>26</sub>N<sub>2</sub>O<sub>4</sub>SNa requires 353.1506.

### Methyl 2-[(2*S*,4*S*)-1-[(*tert*-butoxy)carbonyl]-4-methylpyrrolidin-2-yl]-1,3-thiazole-4-carboxylate **8**

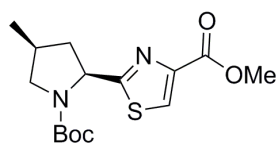

Activated MnO<sub>2</sub> (1.8 g, 21 mmol) was added to a stirred solution of thiazolidine **7** (0.17 g, 0.52 mmol) in MeCN (10 mL) at rt. The reaction mixture was stirred at 60 °C for 24 h, then cooled and filtered through celite. The celite was washed with EtOAc (100 mL) and the filtrate and washings were concentrated *in vacuo*. The crude product was purified by column chromatography (EtOAc:hexane, 1:2) to give the desired product **8** as a colourless solid (0.13 g, 77%). **R<sub>f</sub>**(MeOH:DCM, 1:19) = 0.66; [α]<sub>D</sub> = -80.0 (c 0.10, CHCl<sub>3</sub>); **mp** 80-82 °C; **IR** (neat, cm<sup>-1</sup>) 1736 (C=O), 1697 (C=O); **<sup>1</sup>H NMR** δ (500 MHz, DMSO-d<sub>6</sub>, 363 K) δ 8.34 (1H, s, ArH), 5.06 (1H, t, *J* = 7.9 Hz, α-CH), 3.84 (3H, s, OCH<sub>3</sub>), 3.80 (1H, dd, *J* = 10.3, 7.6 Hz, NCH<sub>X</sub>CH<sub>Y</sub>), 2.97 (1H, dd, *J* = 10.3, 9.1 Hz, NCH<sub>X</sub>CH<sub>Y</sub>), 2.61 (1H, dt, *J* = 12.6, 6.9 Hz, α-CHCH<sub>A</sub>CH<sub>B</sub>), 2.38 – 2.26 (1H, m, CHCH<sub>3</sub>), 1.68 (1H, ddd, *J* = 12.6, 9.8, 8.0 Hz, α-CHCH<sub>A</sub>CH<sub>B</sub>), 1.32 (9H, s, C(CH<sub>3</sub>)<sub>3</sub>), 1.01 (3H, d, *J* = 6.6 Hz, CHCH<sub>3</sub>); **<sup>13</sup>C NMR** δ (126 MHz, DMSO-d<sub>6</sub>, 363 K) 176.08 (C), 161.14 (C), 153.06 (C), 145.03 (C), 128.48 (CH), 79.13 (C), 59.52 (CH), 53.56 (CH<sub>2</sub>), 51.94 (CH<sub>3</sub>), 42.92 (CH<sub>2</sub>), 32.14 (CH), 27.73 (3 × CH<sub>3</sub>), 16.81 (CH<sub>3</sub>); *m/z* (ESI+, MeOH) 675 ([2M+Na]<sup>+</sup>, 10%), 413 (12), 349 ([M+Na]<sup>+</sup>, 100), 301 (10); **HRMS** (ESI+, MeOH) [M+Na]<sup>+</sup> found 349.1194, C<sub>15</sub>H<sub>22</sub>N<sub>2</sub>O<sub>4</sub>SNa requires 349.1193.

### 2-[(2*S*,4*S*)-1-[(*tert*-butoxy)carbonyl]-4-methylpyrrolidin-2-yl]-1,3-thiazole-4-carboxylic acid **9**

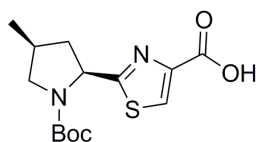

Methyl ester **8** (0.13 g, 0.40 mmol) was dissolved in MeOH (2 mL) and THF (4 mL) and stirred at 0 °C. NaOH (0.50 mL, 0.50 mmol; 1 M aq) was added dropwise and the reaction was allowed to return to rt and stirred for a further 24 h. The reaction was then cooled to 0 °C and acidified to pH 2 by dropwise addition of HCl (1 M aq). The reaction mixture was concentrated *in vacuo* to remove the organic solvents, then extracted with DCM (3 × 10 mL). The combined organic phases were washed with H<sub>2</sub>O (10 mL), dried with anhydrous MgSO<sub>4</sub> and concentrated *in vacuo*. The resulting white crystalline solid **9** was judged to be pure enough for use in SPPS (0.10 g, 80%). **R<sub>f</sub>** (EtOAc:hexane, 1:4) = 0.05; [α]<sub>D</sub> = -70.0 (c 0.10, CHCl<sub>3</sub>); **IR** (neat, cm<sup>-1</sup>) 3300-2800 (OH), 1699 (C=O); **<sup>1</sup>H NMR** δ (500 MHz, DMSO-d<sub>6</sub>, 363 K) 8.25 (1H, s, ArH), 5.05 (1H, t, *J* = 7.9 Hz, α-CH), 3.80 (1H, dd, *J* = 10.7, 7.5 Hz, NCH<sub>X</sub>H<sub>Y</sub>), 2.97 (1H, dd, *J* = 10.7, 9.1 Hz, NCH<sub>X</sub>H<sub>Y</sub>), 2.60 (1H, dt, *J* = 12.6, 6.9 Hz, α-CHCH<sub>A</sub>H<sub>B</sub>), 2.36 – 2.25 (1H, m, CHCH<sub>3</sub>), 1.69 (1H, ddd, *J* = 12.6, 9.8, 8.0 Hz, α-CHCH<sub>A</sub>H<sub>B</sub>), 1.32 (9H, s, C(CH<sub>3</sub>)<sub>3</sub>), 1.01 (3H, d, *J* = 6.6 Hz, CHCH<sub>3</sub>); **<sup>13</sup>C NMR** δ (126 MHz, DMSO-d<sub>6</sub>, 363 K) 174.70 (C), 161.38 (C), 153.10 (C), 146.37 (C), 126.82 (CH), 78.84 (C), 58.98 (CH), 53.47 (CH<sub>2</sub>), 41.68 (CH<sub>2</sub>), 31.82 (CH), 27.52 (3 × CH<sub>3</sub>), 16.57 (CH<sub>3</sub>); *m/z* (ESI+, MeOH) 704 (34%), 413 (28), 335 ([M+Na]<sup>+</sup>, 100), 301 (22), 102 (14); **HRMS** (ESI+, MeOH) [M+Na]<sup>+</sup> found 335.1038, C<sub>14</sub>H<sub>20</sub>N<sub>2</sub>O<sub>4</sub>SNa requires 335.1036.

## 1.4 Experimental Procedures for Synthesis of NMe-D-BrTyr Fragment

### Methyl (2R)-3-(3-Bromo-4-tert-butoxy-phenyl)-2-(tert-butoxycarbonylamino)- propanoate **11**

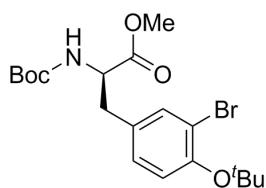

Phenol **10**<sup>[3]</sup> (4.08 g, 10.9 mmol) and Sc(OTf)<sub>3</sub> (0.271 g, 0.553 mmol) were dissolved in DCM (40 mL) at rt. Di-*tert*-butyl-dicarbonate (14.3 g, 65.4 mmol) was added and the reaction was monitored by TLC (vanillin dip). Extra portions of di-*tert*-butyl-dicarbonate (4.76 g, 21.8 mmol) were added if the TLC indicated it was no longer present. When the reaction was judged complete it was quenched with H<sub>2</sub>O (40 mL) and the aqueous phase was extracted with DCM (3 × 40 mL). The combined organic phases were dried with anhydrous MgSO<sub>4</sub> and concentrated *in vacuo*. The crude product was purified by column chromatography (DCM) to give the desired product **11** as a colourless oil (3.04 g, 65%). **R<sub>f</sub>** (EtOAc:hexane, 1:4) = 0.40; **[α]<sub>D</sub>** = -53.0 (c 1.00, CHCl<sub>3</sub>); **IR** (neat, cm<sup>-1</sup>) 3370 (NH), 1744 (C=O), 1715 (C=O), 1601; **<sup>1</sup>H NMR** δ (500 MHz, CDCl<sub>3</sub>, 323 K) 7.33 (1H, d, *J* = 2.1 Hz, ArH), 7.03 (1H, d, *J* = 8.3 Hz, ArH), 6.98 (1H, dd, *J* = 8.3, 2.1 Hz, ArH), 4.98 (1H, br s, NH), 4.53 (1H, br s, α-CH), 3.71 (3H, s, OCH<sub>3</sub>), 3.05 (1H, dd, *J* = 13.9, 5.8 Hz, CH<sub>A</sub>H<sub>B</sub>Ar), 2.94 (1H, dd, *J* = 13.7, 6.3 Hz, CH<sub>A</sub>H<sub>B</sub>Ar), 1.43 (9H, s, C(CH<sub>3</sub>)<sub>3</sub>), 1.43 (9H, s, C(CH<sub>3</sub>)<sub>3</sub>); **<sup>13</sup>C NMR** δ (126 MHz, CDCl<sub>3</sub>, 323 K) 172.23 (C), 155.11 (C), 152.62 (C), 134.26 (CH), 132.41 (C), 128.77 (CH), 123.72 (CH), 119.12 (C), 81.36 (C), 80.20 (C), 54.69 (CH), 52.26 (CH<sub>3</sub>), 37.76 (CH<sub>2</sub>), 29.20 (3 × CH<sub>3</sub>), 28.47 (3 × CH<sub>3</sub>); ***m/z*** (ESI+, MeOH) 885 ([2(<sup>81</sup>BrM)+Na]<sup>+</sup>, 19%), 883 ([(<sup>81</sup>BrM+<sup>79</sup>BrM)+Na]<sup>+</sup>, 38), 881 ([2(<sup>79</sup>BrM)+Na]<sup>+</sup>, 19), 454 ([<sup>81</sup>BrM+Na]<sup>+</sup>, 100), 452 ([<sup>79</sup>BrM+Na]<sup>+</sup>, 100), 332 (10), 330 (11); **HRMS** (ESI+, MeOH) [<sup>79</sup>BrM+Na]<sup>+</sup> found 452.1042, C<sub>19</sub>H<sub>28</sub>NO<sub>5</sub><sup>79</sup>BrNa requires 452.1043.

### Methyl (2R)-3-(3-Bromo-4-tert-butoxy-phenyl)-2-(tert-butoxycarbonylmethylamino)- propanoate **12**

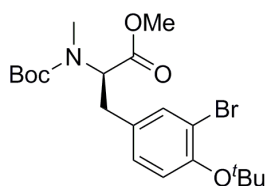

Carbonate **11** (2.32 g, 5.40 mmol) was dissolved in dry THF (50 mL) and stirred at 0 °C. NaH (0.320 g, 8.10 mmol, 60% dispersion in mineral oil) was added in small portions and the reaction was stirred for 15 min at 0 °C. A solution of MeI (2.69 mL, 43.2 mmol) in DMF (10 mL) was then added and the reaction was stirred for a further 60 min at 0 °C before being allowed to return to rt and stirred for 18 h. The reaction mixture was diluted with EtOAc (100 mL) then quenched with NaHCO<sub>3</sub> (100 mL; sat aq). The aqueous phase was extracted with EtOAc (3 × 100 mL) and the combined organic phases were washed with brine (100 mL; sat aq) then dried with anhydrous MgSO<sub>4</sub>. The solvent was removed *in vacuo* and the crude product was purified by column chromatography (DCM:MeOH, 98:2) to give the desired product **12** as a colourless oil (1.75 g, 73%). **R<sub>f</sub>** (EtOAc:hexane, 1:4) = 0.38; **[α]<sub>D</sub>** = -27.5 (c 0.20, CHCl<sub>3</sub>); **IR** (neat, cm<sup>-1</sup>) 1744 (C=O), 1694 (C=O), 1599; **<sup>1</sup>H NMR** δ (400 MHz, DMSO-d<sub>6</sub>, 403 K) 7.44 (1H, d, *J* = 1.9 Hz, ArH), 7.13 (1H, dd, *J* = 8.3, 1.9 Hz, ArH), 7.09 (1H, d, *J* = 8.3 Hz, ArH), 4.71 (1H, dd, *J* = 10.4, 5.1 Hz, α-CH), 3.70 (3H, s, OCH<sub>3</sub>), 3.16 (1H, dd, *J* = 14.4, 5.1 Hz, CH<sub>A</sub>H<sub>B</sub>Ar), 2.99 (1H, dd, *J* = 14.4, 10.4 Hz, CH<sub>A</sub>H<sub>B</sub>Ar), 2.66 (3H, s, NCH<sub>3</sub>), 1.39 (9H, s, C(CH<sub>3</sub>)<sub>3</sub>), 1.34 (9H, s, C(CH<sub>3</sub>)<sub>3</sub>); **<sup>13</sup>C NMR** δ (101 MHz, DMSO-d<sub>6</sub>, 353 K) 171.33 (C), 154.94 (C), 151.84 (C), 134.46 (C), 133.83 (CH), 129.36 (CH), 123.66 (CH), 118.15 (C), 81.08 (C), 79.74 (C), 60.65 (CH), 52.27 (CH<sub>3</sub>), 33.96 (CH<sub>2</sub>), 32.70 (CH<sub>3</sub>), 29.21 (3 × CH<sub>3</sub>), 28.38 (3 × CH<sub>3</sub>); ***m/z*** (ESI+, MeOH) 913 ([2(<sup>81</sup>BrM)+Na]<sup>+</sup>, 11%), 911 ([(<sup>81</sup>BrM+<sup>79</sup>BrM)+Na]<sup>+</sup>, 21), 909 ([2(<sup>79</sup>BrM)+Na]<sup>+</sup>, 11), 468 ([<sup>81</sup>BrM+Na]<sup>+</sup>, 100), 466 ([<sup>79</sup>BrM+Na]<sup>+</sup>, 100), 346 (25), 344 (27); **HRMS** (ESI+, MeOH) [<sup>79</sup>BrM+Na]<sup>+</sup> found 466.1199, C<sub>20</sub>H<sub>30</sub>NO<sub>5</sub><sup>79</sup>BrNa requires 466.1200.

### (2R)-3-(3-Bromo-4-*tert*-butoxy-phenyl)-2-(*tert*-butoxycarbonylmethylamino)-propionic acid **13**

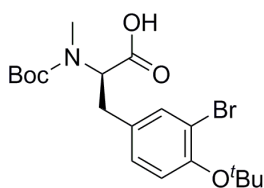

Methyl ester **12** (4.51 g, 10.2 mmol) was dissolved in MeOH (20 mL) and THF (40 mL) and stirred at 0 °C. NaOH (13 mL, 12.7 mmol, 1 M aq) was added dropwise and the reaction was allowed to return to rt and stirred for a further 24 h. The reaction was then cooled to 0 °C and acidified to pH 2 by dropwise addition of HCl (1 M aq). The reaction mixture was concentrated *in vacuo* to remove the THF and MeOH, then extracted with DCM (3 × 100 mL). The combined organic phases were washed with H<sub>2</sub>O (100 mL), dried with anhydrous MgSO<sub>4</sub> and concentrated *in vacuo*. The resulting colourless oil **13** was judged to be pure enough for use without further purification (3.85 g, 88%). **R<sub>f</sub>** (EtOAc:hexane, 1:4) = 0.06; [**α**]<sub>D</sub> = +11.0 (c 1.00, CHCl<sub>3</sub>); **IR** (neat, cm<sup>-1</sup>) 3400-3150 (OH), 1734 (C=O), 1694 (C=O); **<sup>1</sup>H NMR** δ (500 MHz, DMSO-d<sub>6</sub>, 363 K) 7.43 (1H, d, *J* = 2.0 Hz, *ArH*), 7.13 (1H, dd, *J* = 8.3, 2.0 Hz, *ArH*), 7.09 (1H, d, *J* = 8.3 Hz, *ArH*), 4.67 (1H, br s, α-*CH*), 3.14 (1H, dd, *J* = 14.5, 4.9 Hz, *CH<sub>A</sub>H<sub>B</sub>Ar*), 2.95 (1H, dd, *J* = 14.5, 10.8 Hz, *CH<sub>A</sub>H<sub>B</sub>Ar*), 2.66 (3H, s, *NCH<sub>3</sub>*), 1.38 (9H, s, *C(CH<sub>3</sub>)<sub>3</sub>*), 1.33 (9H, s, *C(CH<sub>3</sub>)<sub>3</sub>*); **<sup>13</sup>C NMR** δ (126 MHz, DMSO-d<sub>6</sub>, 363 K) 171.22 (C), 154.26 (C), 150.79 (C), 133.94 (C), 132.77 (CH), 128.32 (CH), 122.64 (CH), 117.11 (C), 80.11 (C), 78.57 (C), 59.44 (CH), 33.03 (CH<sub>2</sub>), 31.19 (CH<sub>3</sub>), 28.28 (3 × CH<sub>3</sub>), 27.48 (3 × CH<sub>3</sub>); ***m/z*** (ESI+, MeOH) 885 ([2(<sup>81</sup>BrM)+Na]<sup>+</sup>, 55%), 883 ([(<sup>81</sup>BrM+<sup>79</sup>BrM)+Na]<sup>+</sup>, 100), 881 ([2(<sup>79</sup>BrM)+Na]<sup>+</sup>, 55), 484 (26), 482 (25), 454 ([<sup>81</sup>BrM+Na]<sup>+</sup>, 37), 452 ([<sup>79</sup>BrM+Na]<sup>+</sup>, 38); **HRMS** (ESI+, MeOH) [<sup>79</sup>BrM+Na]<sup>+</sup> found 452.1042, C<sub>19</sub>H<sub>28</sub>NO<sub>5</sub><sup>79</sup>BrNa requires 452.1043.

## 1.5 SPSS – Rink Amide Resin

### Attachment of first amino acid to Rink Amide:

Rink Amide resin (200-400 mesh, 0.69 mmol/g) (0.20 g, 0.14 mmol, 1.00 eq.) was swollen in DCM (5 cm<sup>3</sup>) for 30 min, then washed with DMF (3 × 3 cm<sup>3</sup>). The resin was purchased in Fmoc protected form so the general procedure for Fmoc deprotection was followed before attachment of the first amino acid.

The Fmoc-protected amino acid residue (0.41 mmol, 3.00 eq.) and Oxyma (0.06 g, 0.41 mmol, 3.00 eq.) were dissolved in DMF (2 cm<sup>3</sup>) and DIC (64.1 μL, 0.41 mmol, 3.00 eq.) was added. The reaction mixture was agitated for 5 min before addition to the resin, which was then agitated for 1 h at rt. The reaction mixture was removed and the resin washed with DMF (3 × 3 cm<sup>3</sup>), DCM (3 × 3 cm<sup>3</sup>), MeOH (3 × 3 cm<sup>3</sup>) and DCM (3 × 3 cm<sup>3</sup>). The Chloranil test was performed and coupling was repeated if any blue beads were observed.

### Fmoc deprotection:

20% Piperidine in DMF (3 mL) was added to the resin and the resin was agitated for 10 min at rt. This was repeated with fresh solution for a further 10 min, then the resin was washed with DMF (3 × 3 cm<sup>3</sup>), DCM (3 × 3 cm<sup>3</sup>), MeOH (3 × 3 cm<sup>3</sup>) and DCM (3 × 3 cm<sup>3</sup>). The Chloranil test was performed and the deprotection was repeated if any colourless beads were observed.

**Boc Deprotection:**

A 1:1 mixture of TFA and DCM (4 mL) was added to the resin and the resin was agitated for 5 min. This was repeated with fresh solution for a further 20 min, then the resin was washed with DCM ( $3 \times 3 \text{ cm}^3$ ), MeOH ( $3 \times 3 \text{ cm}^3$ ) and DCM ( $3 \times 3 \text{ cm}^3$ ). The Chloranil test was performed and the coupling was repeated if any colourless beads were observed.

**Selective Boc deprotection:**

The resin was solvated in dry DCM (5 mL) and chilled (dry ice) before addition of 2,6-lutidine (242  $\mu\text{L}$ , 2.10 mmol, 15 eq.) and TMSOTf (304  $\mu\text{L}$ , 1.68 mmol, 12 eq.). The resin was agitated at  $-78 \text{ }^\circ\text{C}$  for 15 min then for a further 90 min at rt. The reaction mixture was removed and the resin washed with DCM ( $3 \times 3 \text{ cm}^3$ ), MeOH ( $3 \times 3 \text{ cm}^3$ ) and DCM ( $3 \times 3 \text{ cm}^3$ ). TBAF (3 mL, 1 M in THF) was then added and the resin was agitated for 10 min. This was repeated with fresh solution, then the resin was washed with DCM ( $3 \times 3 \text{ cm}^3$ ), MeOH ( $3 \times 3 \text{ cm}^3$ ) and DCM ( $3 \times 3 \text{ cm}^3$ ). The Chloranil test was performed and the coupling was repeated if any colourless beads were observed.

**Amino Acid coupling:**

The Boc or Fmoc-protected amino acid residue (0.41 mmol, 3.00 eq.) and Oxyma (0.06 g, 0.41 mmol, 3.00 eq.) were dissolved in DMF ( $2 \text{ cm}^3$ ) and DIC (64.1  $\mu\text{L}$ , 0.41 mmol, 3.00 eq.) was added. The reaction mixture was agitated for 5 min before addition to the resin,\* and the resin was then agitated for 1 h at rt. The reaction mixture was removed and the resin washed with DMF ( $3 \times 3 \text{ cm}^3$ ), DCM ( $3 \times 3 \text{ cm}^3$ ), MeOH ( $3 \times 3 \text{ cm}^3$ ) and DCM ( $3 \times 3 \text{ cm}^3$ ). The Chloranil test was performed and the coupling was repeated if any blue beads were observed.

\* If the coupling step followed a Boc deprotection then DIPEA (36.6  $\mu\text{L}$ , 0.210 mmol, 1.50 eq.) was also added to the resin at this point.

**Cleavage of Peptide from Rink Amide:**

A mixture of TFA:TIS:H<sub>2</sub>O ( $3 \text{ cm}^3$ , 95:2.5:2.5) was added to the resin and the resin was agitated at rt for 3 h. The reaction solution was filtered and collected, then evaporated to dryness under nitrogen. The resulting residue was cooled in an ice bath and cold ether was added until a colourless precipitate formed. The suspension was cooled (dry ice) to ensure complete precipitation, then centrifuged (5000 rpm, 5 min), and the ether poured off before fresh ether ( $15 \text{ cm}^3$ ) was added. Sonication was used to re-mobilise the precipitate and the suspension was centrifuged again (5000 rpm, 5 min). The ether was then decanted and the resulting white pellet purified to obtain the desired product.



## 1.6 Spectroscopic Data for Tz-BBA analogues Bis1-6

### Piv-Ala-(NMe-D-BrTyr)-(4-MePro-Tz)-(D-Leu)-(NMe-Phe)-Opp Bis1

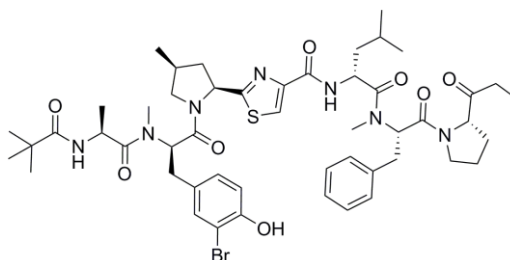

| Amino Acid     | Position                                   | $\delta$ (500 MHz) | integration | multiplicity | $J$ (Hz)  |
|----------------|--------------------------------------------|--------------------|-------------|--------------|-----------|
| <b>Opp</b>     | $\alpha$ -CH                               | 4.55               | 1           | dd           | 9.0, 4.5  |
|                | $CH_A H_B$                                 | 2.20 – 2.10        | 1           | m            | -         |
|                | $CH_A H_B + CH_2$                          | 1.92 – 1.78        | 3           | m            | -         |
|                | NCH <sub>2</sub>                           | 3.59               | 2           | t            | 6.8       |
|                | $CH_2 CH_3$                                | 2.55 – 2.47        | 2           | m            | -         |
|                | $CH_2 CH_3$                                | 1.03               | 3           | t            | 7.3       |
| <b>Phe</b>     | $\alpha$ -CH                               | 5.80               | 1           | dd           | 10.4, 5.7 |
|                | $CH_A H_B$                                 | 3.14 – 3.09        | 1           | m            | -         |
|                | $CH_A H_B$                                 | 3.08 – 2.99        | 1           | m            | -         |
|                | ArH                                        | 7.29 – 7.15        | 5           | m            | -         |
|                | N-CH <sub>3</sub>                          | 3.09               | 3           | s            | -         |
| <b>Leu</b>     | $\alpha$ -CH                               | 4.90 – 4.84        | 1           | m            | -         |
|                | $CH_A H_B$                                 | 1.26 – 1.22        | 1           | m            | -         |
|                | $CH_A H_B$                                 | 0.85 – 0.80        | 1           | m            | -         |
|                | CH                                         | 1.47 – 1.39        | 1           | m            | -         |
|                | CH <sub>3</sub>                            | 0.86               | 3           | d            | 6.5       |
|                | CH <sub>3</sub>                            | 0.80               | 3           | d            | 6.7       |
| <b>MeProTz</b> | $\alpha$ -CH                               | 5.28               | 1           | dd           | 16.8, 8.9 |
|                | $\alpha$ -CHCH <sub>A</sub> H <sub>B</sub> | 2.63 – 2.55        | 1           | m            | -         |
|                | $\alpha$ -CHCH <sub>A</sub> H <sub>B</sub> | 1.76 – 1.70        | 1           | m            | -         |
|                | CHCH <sub>3</sub>                          | 2.34 – 2.26        | 1           | m            | -         |
|                | CHCH <sub>3</sub>                          | 1.05               | 3           | d            | 6.4       |
|                | NCH <sub>X</sub> H <sub>Y</sub>            | 3.68               | 1           | dd           | 11.0, 7.0 |
|                | NCH <sub>X</sub> H <sub>Y</sub>            | 3.18 – 3.12        | 1           | m            | -         |
|                | ArH                                        | 8.07               | 1           | s            | -         |
| <b>BrTyr</b>   | $\alpha$ -CH                               | 5.63               | 1           | dd           | 10.4, 5.3 |
|                | $CH_A H_B$                                 | 3.03 – 2.98        | 1           | m            | -         |
|                | $CH_A H_B$                                 | 2.84 – 2.73        | 1           | m            | -         |
|                | ArH                                        | 7.31               | 1           | d            | 2.1       |
|                |                                            | 7.02               | 1           | dd           | 8.2, 2.1  |
|                |                                            | 6.77               | 1           | d            | 8.2       |
|                | N-CH <sub>3</sub>                          | 2.95               | 3           | s            | -         |
| <b>Ala</b>     | $\alpha$ -CH                               | 4.60               | 1           | q            | 7.1       |
|                | CH <sub>3</sub>                            | 0.95               | 3           | d            | 7.1       |
| <b>Piv</b>     | (CH <sub>3</sub> ) <sub>3</sub>            | 1.16               | 9           | s            | -         |

Yield 14.5 mg, 2% (Semicarbazide resin). **R<sub>t</sub>** (Method B) = 31.0 min; <sup>13</sup>C NMR δ (126 MHz, MeOD) 211.36 (C), 180.67 (C), 175.18 (C), 174.98 (C), 174.47 (C), 170.82 (C), 170.17 (C), 163.07 (C), 154.06 (C), 149.62 (C), 138.09 (C), 134.97 (CH), 130.91 (CH), 130.84 (C), 130.62 (2 × CH), 129.46 (2 × CH), 127.82 (CH), 124.99 (CH), 116.98 (CH), 110.35 (C), 66.51 (CH), 61.17 (CH), 57.67 (CH), 56.67 (CH), 55.94 (CH<sub>2</sub>), 49.45 (CH), 47.35 (CH<sub>2</sub>), 46.87 (CH), 42.59 (CH<sub>2</sub>), 41.16 (CH<sub>2</sub>), 39.26 (C), 35.62 (CH<sub>2</sub>), 35.14 (CH), 34.23 (CH<sub>2</sub>), 33.52 (CH<sub>2</sub>), 31.41 (CH<sub>3</sub>), 31.23 (CH<sub>3</sub>), 29.06 (CH<sub>2</sub>), 27.77 (3 × CH<sub>3</sub>), 25.88 (CH), 25.71 (CH<sub>2</sub>), 23.63 (CH<sub>3</sub>), 21.64 (CH<sub>3</sub>), 16.78 (CH<sub>3</sub>), 16.51 (CH<sub>3</sub>), 7.75 (CH<sub>3</sub>); **m/z** (ESI+, MeOH) 1031 ([<sup>81</sup>BrM+Na]<sup>+</sup>, 100%), 1029 ([<sup>79</sup>BrM+Na]<sup>+</sup>, 90), 524 (11), 242 (17); **HRMS** (ESI+, MeOH) [<sup>79</sup>BrM+H]<sup>+</sup> found 1006.4101, C<sub>50</sub>H<sub>69</sub>N<sub>7</sub>O<sub>8</sub>S<sup>79</sup>Br requires 1006.4106.

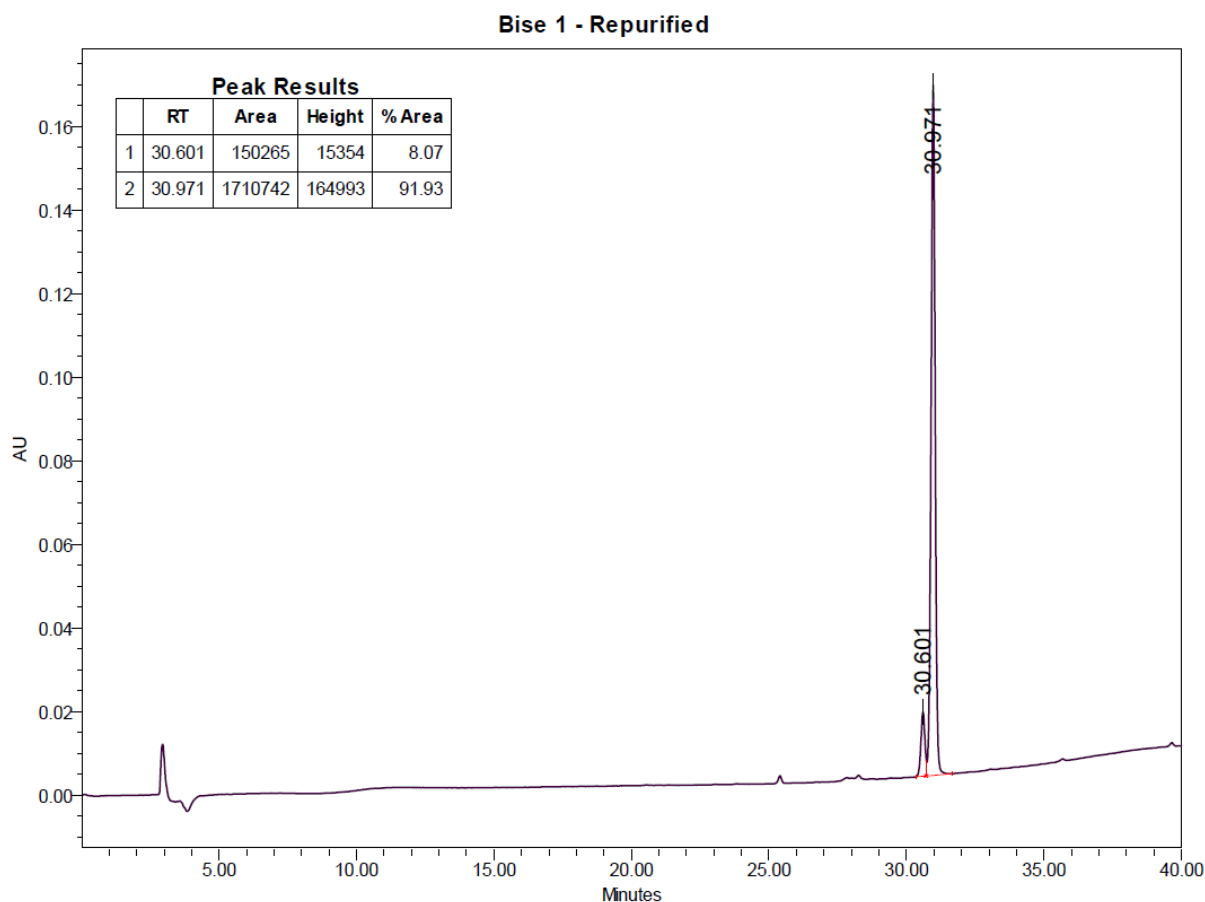

Sample Name: Bise1MajP2  
 Sample Type: Unknown  
 Vial: 2  
 Injection #: 1  
 Injection Volume: 10.00 ul  
 Run Time: 50.0 Minutes

Acquired By: System  
 Sample Set Name: BiseCleanRuns  
 Acq. Method Set: GenGrad  
 Processing Method: Default  
 Channel Name: 254.0nm  
 Proc. Chnl. Descr.: PDA 254.0 nm

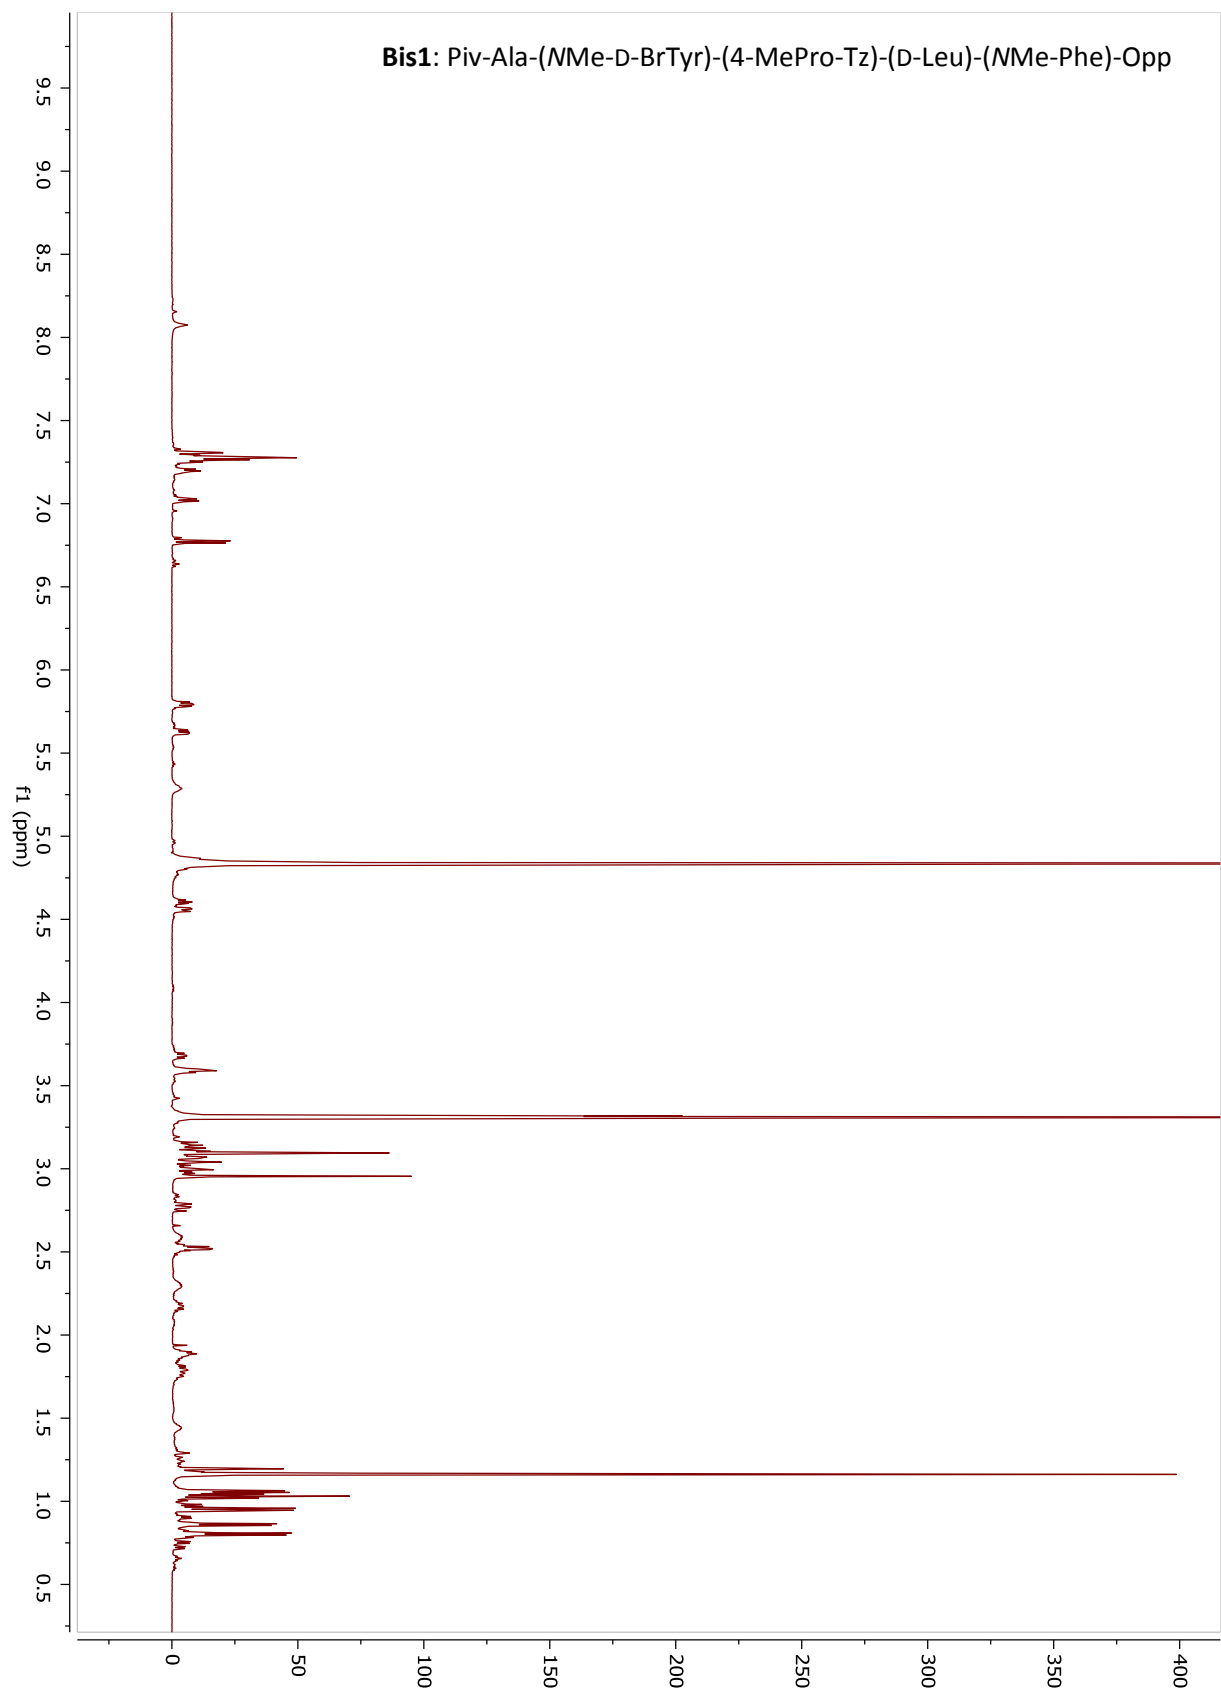

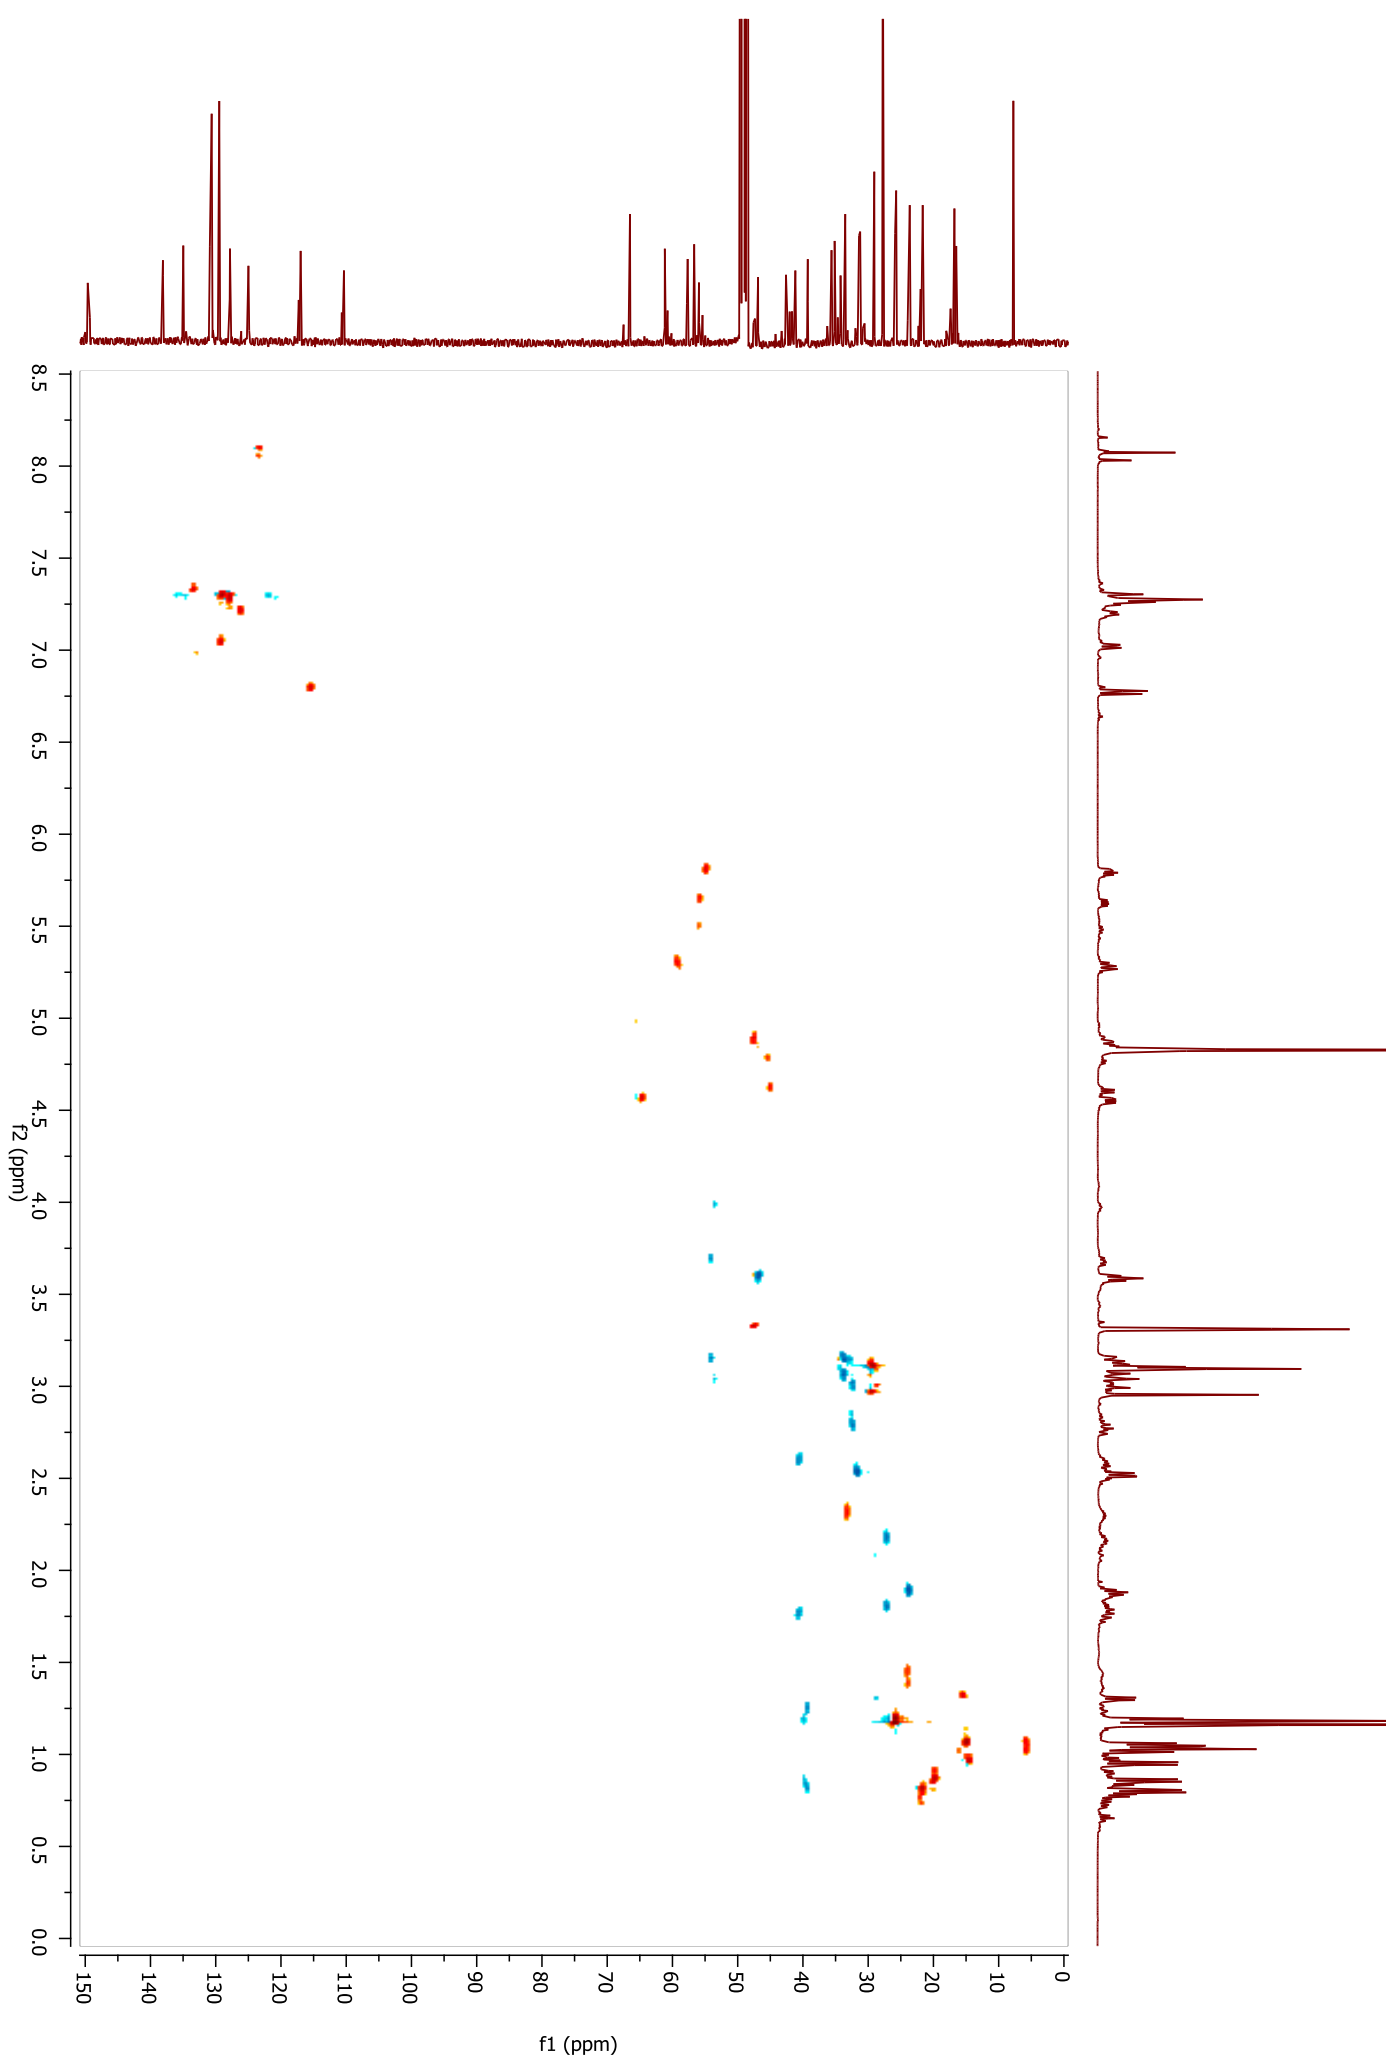

f1 (ppm)

-S11-

**Piv-Ala-(NMe-D-BrTyr)-(4-MePro-Tz)-(D-Leu)-(NMe-Phe)-Ala-NH<sub>2</sub> Bis2**

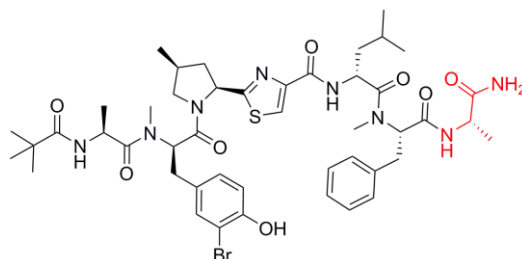

| Amino Acid     | Position <sup>#</sup>                      | $\delta$    | integration | multiplicity | $J$ (Hz)   |
|----------------|--------------------------------------------|-------------|-------------|--------------|------------|
| <b>Ala</b>     | $\alpha$ -CH                               | 4.44 – 4.38 | 1           | m            | -          |
|                | CH <sub>3</sub>                            | 1.44        | 3           | d            | 7.1        |
| <b>Phe</b>     | $\alpha$ -CH                               | 5.54        | 1           | dd           | 11.9, 4.7  |
|                | CH <sub>A</sub> H <sub>B</sub>             | 3.42        | 1           | dd           | 14.7, 4.7  |
|                | CH <sub>A</sub> H <sub>B</sub>             | 3.09 – 3.05 | 1           | m            | -          |
|                | ArH                                        | 7.32 – 7.17 | 5           | m            | -          |
|                | N-CH <sub>3</sub>                          | 3.11        | 3           | s            | -          |
| <b>Leu</b>     | $\alpha$ -CH                               | 4.85 – 4.77 | 1           | m            | -          |
|                | CH <sub>A</sub> H <sub>B</sub>             | 1.35 – 1.30 | 1           | m            | -          |
|                | CH <sub>A</sub> H <sub>B</sub>             | 0.95 – 0.88 | 1           | m            | -          |
|                | CH                                         | 1.29 – 1.24 | 1           | m            | -          |
|                | CH <sub>3</sub>                            | 0.83        | 3           | d            | 6.4        |
|                | CH <sub>3</sub>                            | 0.78        | 3           | d            | 6.3        |
| <b>MeProTz</b> | $\alpha$ -CH                               | 5.39 – 5.28 | 1           | m            | -          |
|                | $\alpha$ -CHCH <sub>A</sub> H <sub>B</sub> | 2.67 – 2.56 | 1           | m            | -          |
|                | $\alpha$ -CHCH <sub>A</sub> H <sub>B</sub> | 1.77        | 1           | dd           | 12.6, 12.2 |
|                | CHCH <sub>3</sub>                          | 2.38 – 2.28 | 1           | m            | -          |
|                | CHCH <sub>3</sub>                          | 1.08        | 3           | d            | 6.5        |
|                | NCH <sub>X</sub> H <sub>Y</sub>            | 3.72        | 1           | dd           | 11.0, 6.9  |
|                | NCH <sub>X</sub> H <sub>Y</sub>            | 3.20 – 3.13 | 1           | m            | -          |
|                | ArH                                        | 8.10        | 1           | s            | -          |
| <b>BrTyr</b>   | $\alpha$ -CH                               | 5.66        | 1           | dd           | 10.5, 5.3  |
|                | CH <sub>A</sub> H <sub>B</sub>             | 3.05 – 2.95 | 1           | m            | -          |
|                | CH <sub>A</sub> H <sub>B</sub>             | 2.80        | 1           | dd           | 14.4, 10.5 |
|                | ArH                                        | 7.33        | 1           | d            | 2.0        |
|                | ArH                                        | 7.04        | 1           | dd           | 8.3, 2.0   |
|                | ArH                                        | 6.79        | 1           | d            | 8.3        |
|                | N-CH <sub>3</sub>                          | 2.99        | 3           | s            | -          |
| <b>Ala</b>     | $\alpha$ -CH                               | 4.64        | 1           | q            | 7.1        |
|                | CH <sub>3</sub>                            | 0.97        | 3           | d            | 7.1        |
| <b>Piv</b>     | (CH <sub>3</sub> ) <sub>3</sub>            | 1.18        | 9           | s            | -          |

<sup>#</sup>Assignment confirmed by <sup>1</sup>H-<sup>1</sup>H COSY, <sup>1</sup>H-<sup>1</sup>H NOESY and <sup>1</sup>H-<sup>13</sup>C HSQC experiments.

Yield 20.9 mg, 16% (Rink amide resin).  $R_t$  (Method A) = 6.09 min;  $^{13}\text{C}$  NMR  $\delta$  (126 MHz, MeOH- $d_4$ ) 180.71 (C), 175.87 (C), 175.20 (C), 174.99 (C), 171.94 (C), 170.86 (C), 163.31 (C), 154.08 (C), 149.61 (C), 138.58 (C), 138.54 (C), 134.98 (CH), 130.91 (CH), 130.85 (C), 130.14 ( $2 \times$  CH), 129.59 ( $2 \times$  CH), 127.85 (CH), 125.17 (CH), 116.99 (CH), 110.36 (C), 61.20 (CH), 59.71 (CH), 57.67 (CH), 55.97 ( $\text{CH}_2$ ), ( $2 \times$  CH obscured by solvent peak, visible in HSQC spectrum), 46.91 (CH), 42.62 ( $\text{CH}_2$ ), 41.55 ( $\text{CH}_2$ ), 39.28 (C), 35.16 (CH), 35.04 ( $\text{CH}_2$ ), 34.23 ( $\text{CH}_2$ ), 32.49 ( $\text{CH}_3$ ), 31.40 ( $\text{CH}_3$ ), 27.75 ( $3 \times$   $\text{CH}_3$ ), 25.64 (CH), 23.43 ( $\text{CH}_3$ ), 22.26 ( $\text{CH}_3$ ), 18.11 ( $\text{CH}_3$ ), 16.80 ( $\text{CH}_3$ ), 16.54 ( $\text{CH}_3$ );  $m/z$  (ESI+, MeOH) 991 ( $[\text{}^{81}\text{BrM}+\text{Na}]^+$ , 100%), 989 ( $[\text{}^{79}\text{BrM}+\text{Na}]^+$ , 87), 734 (12), 130 (25); HRMS (ESI+, MeOH)  $[\text{}^{79}\text{BrM}+\text{Na}]^+$  found 989.3520,  $\text{C}_{46}\text{H}_{63}\text{N}_8\text{O}_8\text{S}^{79}\text{BrNa}$  requires 989.3565.

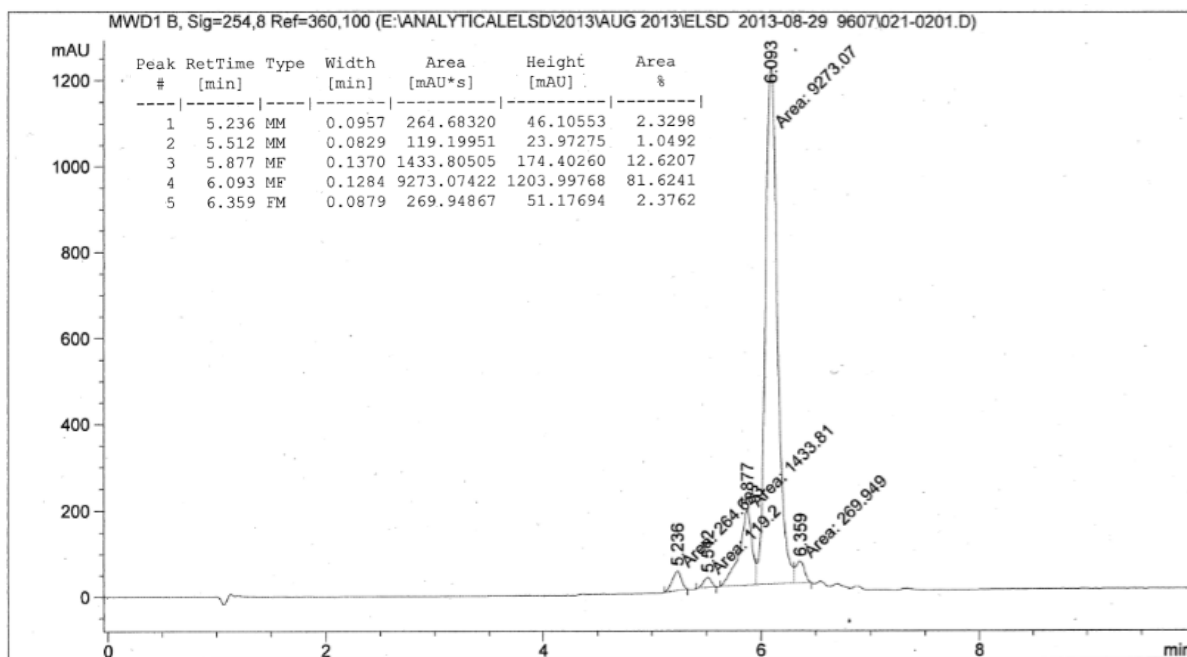

Acq. Operator : marc  
 Acq. Instrument : Instrument 1  
 Injection Date : 29/08/2013 10:31:13 AM  
 Seq. Line : 2  
 Location : Vial 21  
 Inj : 1  
 Inj Volume : 10  $\mu\text{l}$   
 Different Inj Volume from Sequence ! Actual Inj Volume : 20  $\mu\text{l}$   
 Acq. Method : C:\CHEM32\1\DATA\AUG 2013\ELSD 2013-08-29 9607\GE10ACN.M  
 Last changed : 18/06/2011 01:34:23 PM  
 Analysis Method : C:\CHEM32\1\DATA\APR2016\ELSD 2016-04-26 8852\052-1301.D\DA.M (GE10ACN.M)  
 Last changed : 26/04/2016 05:21:24 PM by ELSD (modified after loading)  
 Method Info : Generic Gemini 10cm, 5u

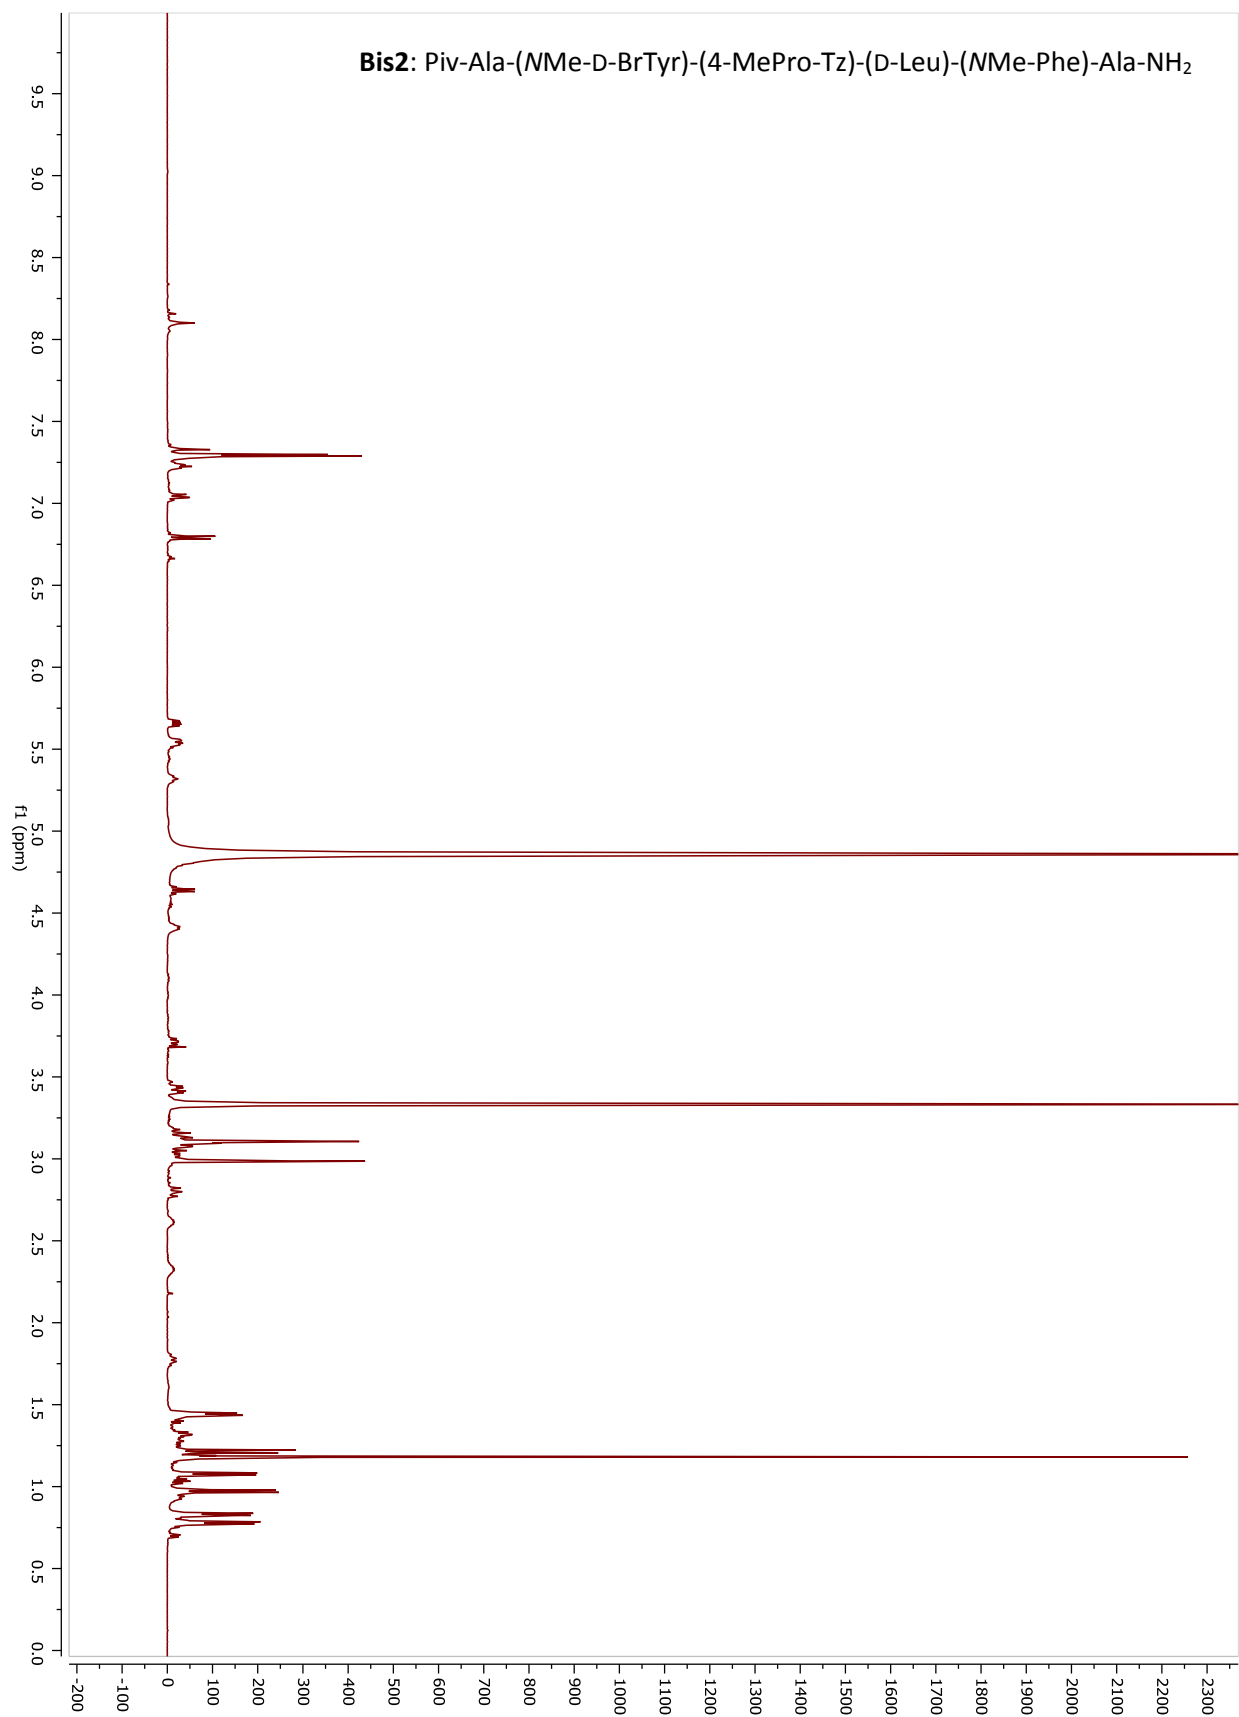

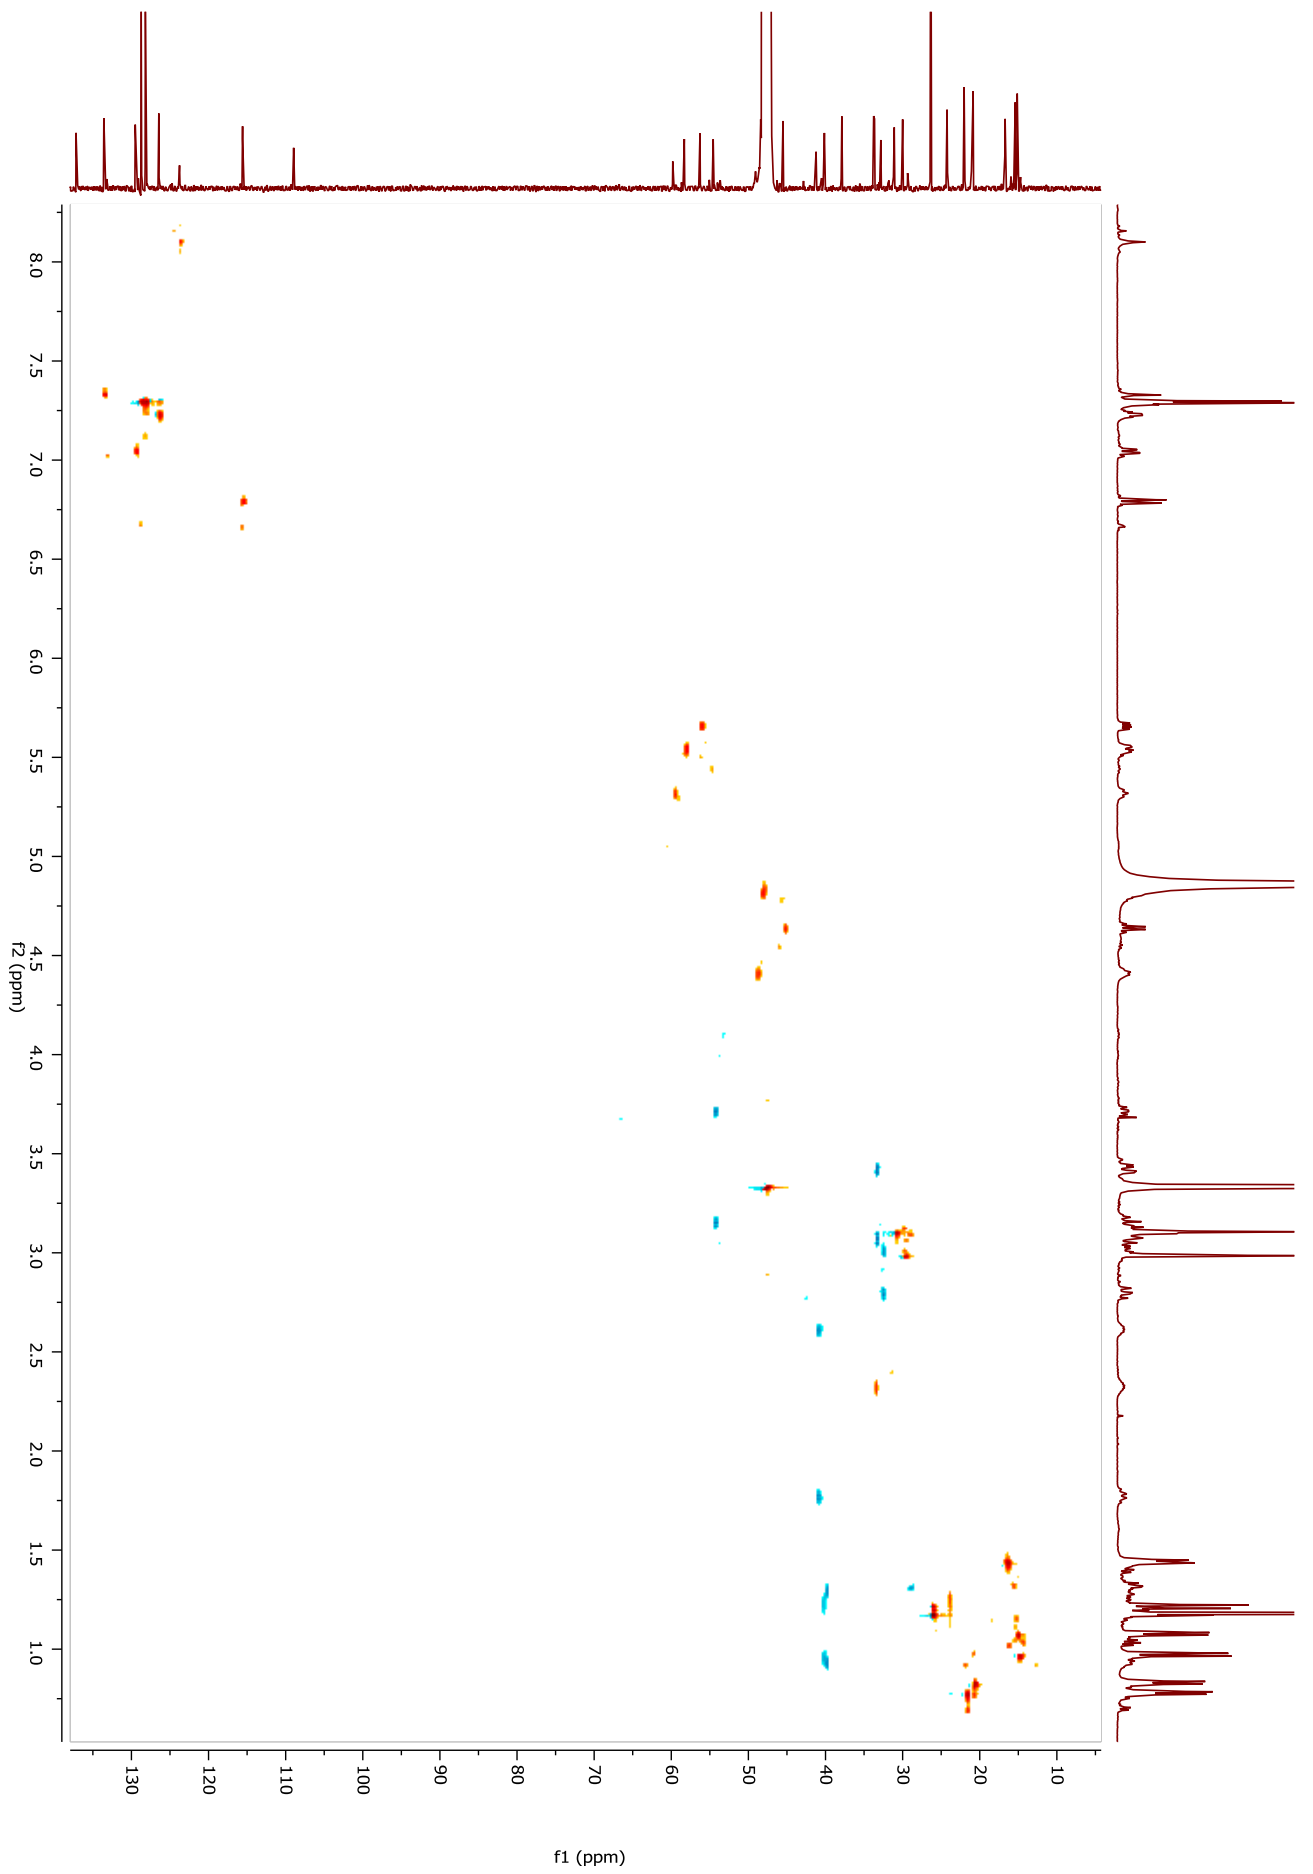

f1 (ppm)

-S15-



**Piv-Ala-(NMe-D-BrTyr)-(4-MePro-Tz)-(D-Leu)-Ala-Opp Bis3**

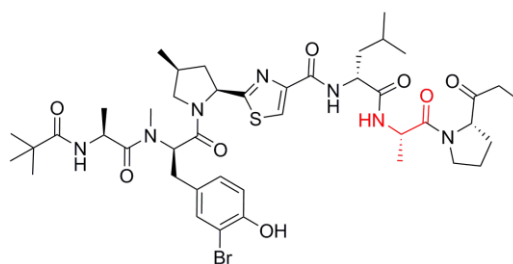

| Amino Acid     | Position                | $\delta$ (500 MHz) | integration | multiplicity | $J$ (Hz)   |
|----------------|-------------------------|--------------------|-------------|--------------|------------|
| <b>Opp</b>     | $\alpha$ -CH            | 4.69 – 4.59        | 1           | m            | -          |
|                | $CH_AH_B$               | 2.24 – 2.15        | 1           | m            | -          |
|                | $CH_AH_B$               | 1.85 – 1.79        | 1           | m            | -          |
|                | $CH_2$                  | 2.03 – 1.94        | 2           | m            | -          |
|                | $NCH_XH_Y$              | 3.82               | 1           | dt           | 10.0, 6.9  |
|                | $NCH_XH_Y$              | 3.62               | 1           | dt           | 9.8, 6.9   |
|                | $CH_2CH_3$              | 2.55               | 2           | q            | 7.2        |
|                | $CH_2CH_3$              | 1.02               | 3           | t            | 7.3        |
| <b>Ala</b>     | $\alpha$ -CH            | 4.69 – 4.59        | 1           | m            | -          |
|                | $CH_3$                  | 1.35               | 3           | d            | 7.0        |
| <b>Leu</b>     | $\alpha$ -CH            | 4.69 – 4.59        | 1           | m            | -          |
|                | $CH_AH_B$               | 1.77 – 1.70        | 1           | m            | -          |
|                | $CH_AH_B$               | 1.68 – 1.60        | 1           | m            | -          |
|                | CH                      | 1.73 – 1.67        | 1           | m            | -          |
|                | $CH_3$                  | 0.96 – 1.02        | 3           | m            | -          |
|                | $CH_3$                  | 0.96 – 1.02        | 3           | m            | -          |
| <b>MeProTz</b> | $\alpha$ -CH            | 5.37 – 5.30        | 1           | m            | -          |
|                | $\alpha$ -CH $CH_AH_B$  | 2.65 – 2.58        | 1           | m            | -          |
|                | $\alpha$ -CH $CH_AH_B$  | 1.80 – 1.73        | 1           | m            | -          |
|                | $CHCH_3$                | 2.34 – 2.26        | 1           | m            | -          |
|                | $CHCH_3$                | 1.06               | 3           | d            | 6.5        |
|                | $NCH_XH_Y$              | 3.70               | 1           | dd           | 10.9, 7.0  |
|                | $NCH_XH_Y$              | 3.18 – 3.07        | 1           | m            | -          |
|                | ArH                     | 8.13               | 1           | s            | -          |
| <b>BrTyr</b>   | $\alpha$ -CH            | 5.64               | 1           | dd           | 10.4, 5.3  |
|                | $CH_AH_B$               | 3.09 – 2.98        | 1           | m            | -          |
|                | $CH_AH_B$               | 2.78               | 1           | dd           | 14.5, 10.5 |
|                | ArH                     | 7.31               | 1           | d            | 2.1        |
|                |                         | 7.03               | 1           | dd           | 8.3, 2.1   |
|                |                         | 6.77               | 1           | d            | 8.2        |
|                | N- $CH_3$               | 2.97               | 3           | s            | -          |
| <b>Ala</b>     | $\alpha$ -CH            | 4.61 – 4.57        | 1           | m            | -          |
|                | $CH_3$                  | 1.01 – 0.94        | 3           | m            | -          |
| <b>Piv</b>     | ( $CH_3$ ) <sub>3</sub> | 1.16               | 9           | s            | -          |

Yield 19.8 mg, 3% (Semicarbazide resin). **R<sub>t</sub>** (Method B) = 27.4 min; <sup>13</sup>C NMR δ (151 MHz, MeOD) 211.16 (C), 180.77 (C), 175.24 (C), 174.06 (C), 172.79 (C), 170.93 (C), 163.14 (C), 154.09 (C), 149.73 (C), 142.07 (C), 134.98 (CH), 130.91 (CH), 130.85 (C), 125.11 (CH), 116.99 (CH), 110.38 (C), 66.18 (CH), 61.24 (CH), 57.68 (CH), 55.99 (CH<sub>2</sub>), 53.14 (CH), (1 × CH + 1 × CH<sub>2</sub> obscured by solvent peak, visible in HSQC spectrum), 46.91 (CH), 42.64 (CH<sub>2</sub>), 42.25 (CH<sub>2</sub>), 39.28 (C), 35.16 (CH), 34.23 (CH<sub>2</sub>), 33.59 (CH<sub>2</sub>), 31.41 (CH<sub>3</sub>), 29.16 (CH<sub>2</sub>), 27.74 (3 × CH<sub>3</sub>), 26.10 (CH), 25.88 (CH<sub>2</sub>), 23.52 (CH<sub>3</sub>), 21.93 (CH<sub>3</sub>), 16.99 (CH<sub>3</sub>), 16.83 (CH<sub>3</sub>), 16.50 (CH<sub>3</sub>), 7.70 (CH<sub>3</sub>); **m/z** (ESI+, MeOH) 940 ([<sup>81</sup>BrM+Na]<sup>+</sup>, 100%), 938 ([<sup>79</sup>BrM+Na]<sup>+</sup>, 85), 646 (10), 644 (9), 510 (14), 408 (14), 217 (16); **HRMS** (ESI+, MeOH) [M+Na]<sup>+</sup> found 938.3464, C<sub>43</sub>H<sub>62</sub>N<sub>7</sub>O<sub>8</sub>S<sup>79</sup>BrNa requires 938.3456.

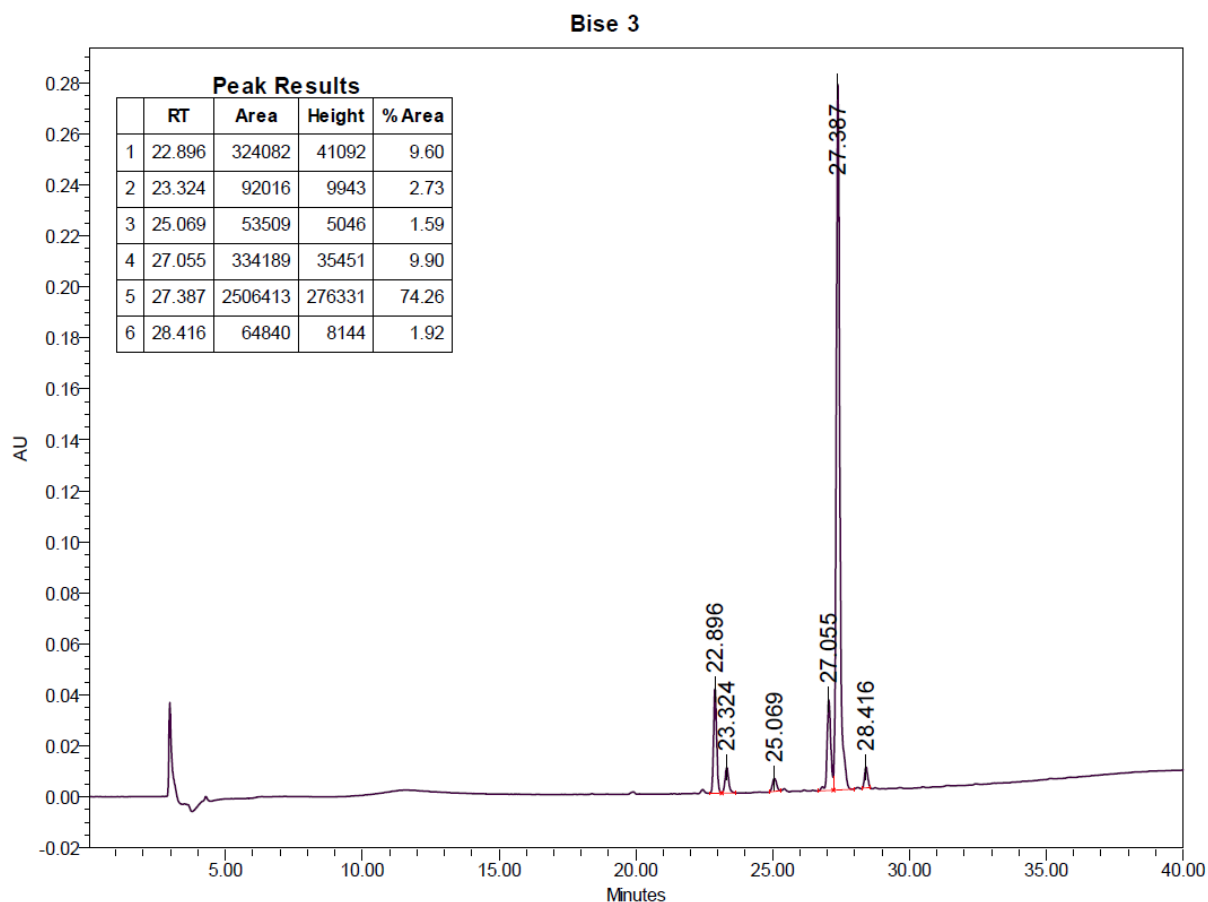

Sample Name: Bise3  
 Sample Type: Unknown  
 Vial: 3  
 Injection #: 1  
 Injection Volume: 10.00 ul  
 Run Time: 50.0 Minutes

Acquired By: System  
 Sample Set Name: Bise3  
 Acq. Method Set: GenGrad  
 Processing Method: FM00352098Run1  
 Channel Name: 254.0nm  
 Proc. Chnl. Descr.: PDA 254.0 nm

**Bis3: Piv-Ala-(NMe-D-BrTyr)-(4-MePro-Tz)-(D-Leu)-Ala-Opp**

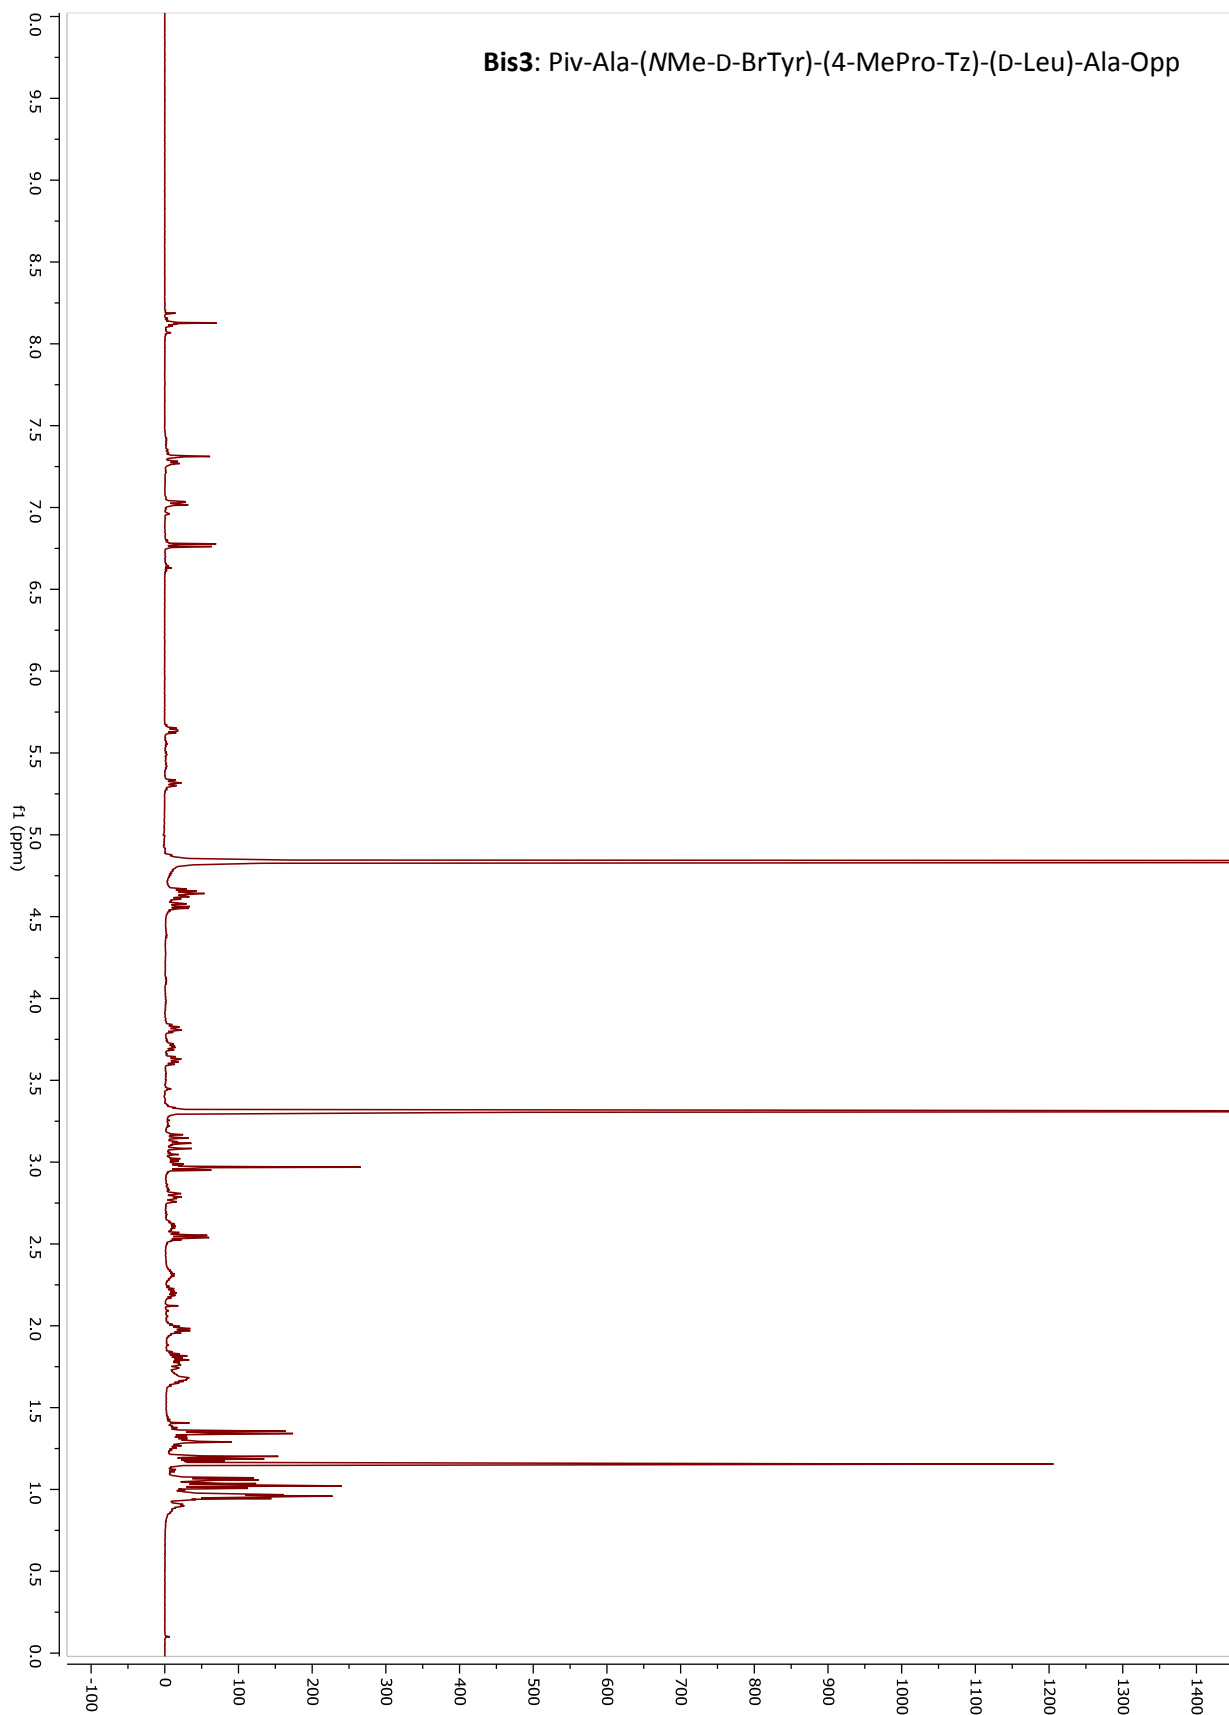

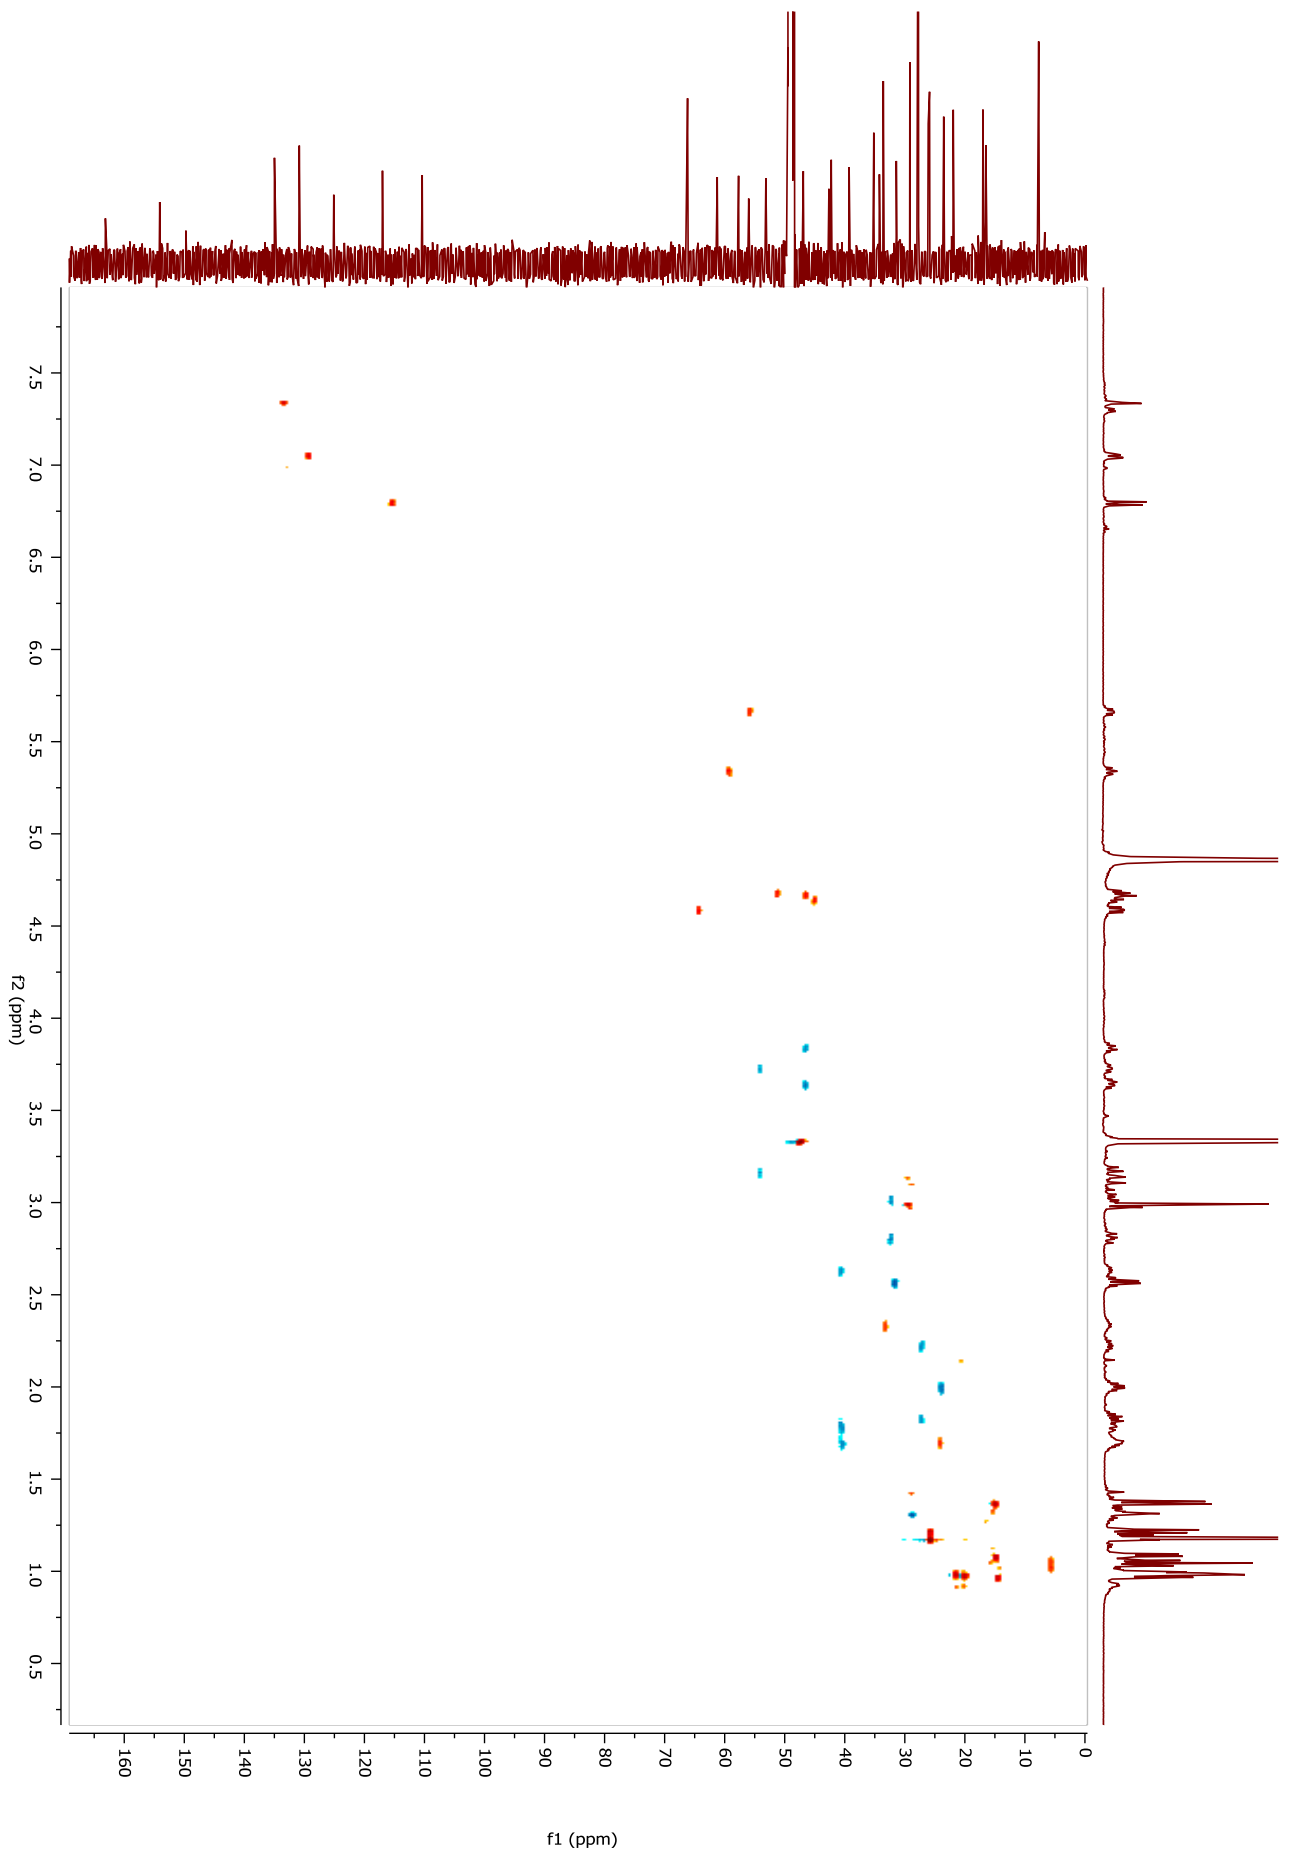

f1 (ppm)

**Piv-Ala-(NMe-D-BrTyr)-(4-MePro-Tz)-Ala-(NMe-Phe)-Opp Bis4**

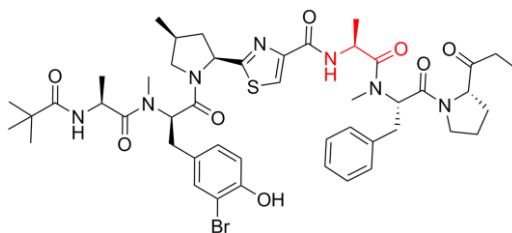

| Amino Acid     | Position                | $\delta$ (500 MHz) | integration | multiplicity | $J$ (Hz)  |
|----------------|-------------------------|--------------------|-------------|--------------|-----------|
| <b>Opp</b>     | $\alpha$ -CH            | 4.51               | 1           | dd           | 8.9, 4.9  |
|                | $CH_AH_B$               | 2.20 – 2.11        | 1           | m            | -         |
|                | $CH_AH_B$               | 1.82 – 1.74        | 1           | m            | -         |
|                | $CH_2$                  | 1.94 – 1.82        | 2           | m            | -         |
|                | $NCH_XH_Y$              | 3.62 – 3.53        | 1           | m            | -         |
|                | $NCH_XH_Y$              | 3.49 – 3.41        | 1           | m            | -         |
|                | $CH_2CH_3$              | 2.49 – 2.39        | 2           | m            | -         |
|                | $CH_2CH_3$              | 1.00               | 3           | t            | 7.2       |
| <b>Phe</b>     | $\alpha$ -CH            | 5.55               | 1           | dd           | 8.0, 7.1  |
|                | $CH_AH_B$               | 3.24 – 3.18        | 1           | m            | -         |
|                | $CH_AH_B$               | 2.99 – 2.93        | 1           | m            | -         |
|                | ArH                     | 7.27 – 7.07        | 5           | m            | -         |
|                | N- $CH_3$               | 3.14               | 3           | s            | -         |
| <b>Ala</b>     | $\alpha$ -CH            | 5.02               | 1           | q            | 6.9       |
|                | $CH_3$                  | 1.37               | 3           | d            | 6.9       |
| <b>MeProTz</b> | $\alpha$ -CH            | 5.31               | 1           | dd           | 9.5, 7.7  |
|                | $\alpha$ -CH $CH_AH_B$  | 2.64 – 2.54        | 1           | m            | -         |
|                | $\alpha$ -CH $CH_AH_B$  | 1.74 – 1.65        | 1           | m            | -         |
|                | $CHCH_3$                | 2.37 – 2.26        | 1           | m            | -         |
|                | $CHCH_3$                | 1.07               | 3           | d            | 6.5       |
|                | $NCH_XH_Y$              | 3.70               | 1           | dd           | 10.9, 6.9 |
|                | $NCH_XH_Y$              | 3.19 – 3.14        | 1           | m            | -         |
|                | ArH                     | 8.12               | 1           | s            | -         |
| <b>BrTyr</b>   | $\alpha$ -CH            | 5.65               | 1           | dd           | 10.6, 5.2 |
|                | $CH_AH_B$               | 3.01 – 2.96        | 1           | m            | -         |
|                | $CH_AH_B$               | 2.84 – 2.75        | 1           | m            | -         |
|                | ArH                     | 7.31               | 1           | d            | 2.0       |
|                |                         | 7.03               | 1           | dd           | 8.3, 2.1  |
|                |                         | 6.78               | 1           | d            | 8.2       |
|                | N- $CH_3$               | 2.95               | 3           | s            | -         |
| <b>Ala</b>     | $\alpha$ -CH            | 4.79               | 1           | q            | 7.1       |
|                | $CH_3$                  | 0.93               | 3           | d            | 7.1       |
| <b>Piv</b>     | ( $CH_3$ ) <sub>3</sub> | 1.15               | 9           | s            | -         |

Yield 32.4 mg, 8% (Semicarbazide resin; completed at 0.5 scale of general procedure).  $R_t$  (Method B) = 28.5 min;  $^{13}\text{C}$  NMR  $\delta$  (126 MHz, MeOD) 211.39 (C), 180.64 (C), 175.34 (C), 174.93 (C), 174.16 (C), 170.70 (C), 170.43 (C), 162.11 (C), 154.11 (C), 149.84 (C), 138.50 (C), 134.96 (CH), 130.90 (CH), 130.85 (C), 130.33 (2  $\times$  CH), 129.53 (2  $\times$  CH), 127.71 (CH), 124.83 (CH), 117.02 (CH), 110.35 (C), 66.46 (CH), 61.07 (CH), 57.98 (CH), 57.52 (CH), 56.07 (CH<sub>2</sub>), (1  $\times$  CH<sub>2</sub> obscured by solvent peak, visible in HSQC spectrum), 46.89 (CH), 46.79 (CH), 42.89 (CH<sub>2</sub>), 39.29 (C), 35.41 (CH<sub>2</sub>), 35.23 (CH), 34.15 (CH<sub>2</sub>), 33.30 (CH<sub>2</sub>), 31.85 (CH<sub>3</sub>), 31.59 (CH<sub>3</sub>), 29.13 (CH<sub>2</sub>), 27.76 (3  $\times$  CH<sub>3</sub>), 25.83 (CH<sub>2</sub>), 18.13 (CH<sub>3</sub>), 16.75 (2  $\times$  CH<sub>3</sub>), 7.72 (CH<sub>3</sub>);  $m/z$  (ESI+, MeOH) 988 ([<sup>81</sup>BrM+Na]<sup>+</sup>, 100%), 986 ([<sup>79</sup>BrM+Na]<sup>+</sup>, 83), 966 (35), 964 (32), 794 (10), 792 (9), 402 (10), 242 (18); **HRMS** (ESI+, MeOH) [<sup>79</sup>BrM+H]<sup>+</sup> found 964.3624, C<sub>47</sub>H<sub>63</sub>N<sub>7</sub>O<sub>8</sub>S<sup>79</sup>Br requires 964.3637.

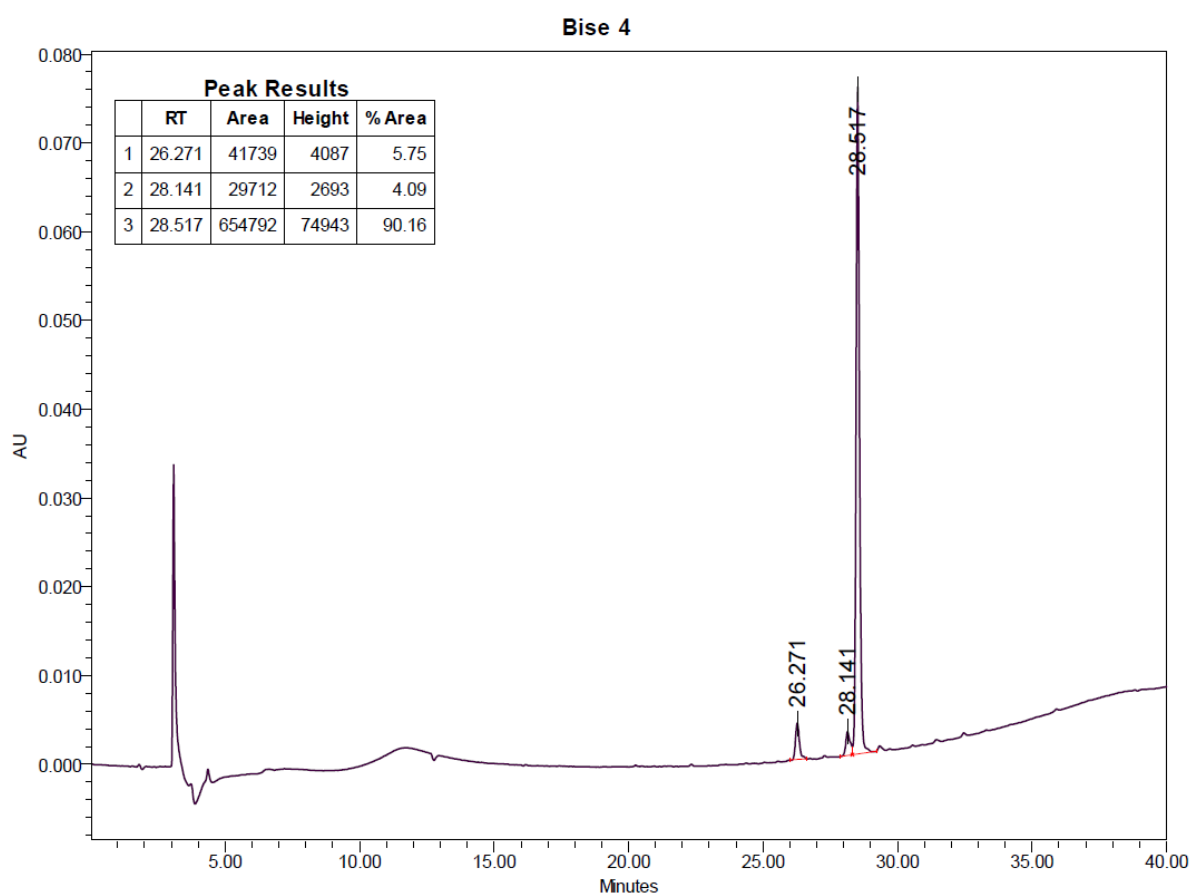

Sample Name: Bise4  
 Sample Type: Unknown  
 Vial: 4  
 Injection #: 1  
 Injection Volume: 10.00 ul  
 Run Time: 50.0 Minutes

Acquired By: System  
 Sample Set Name: Bise4  
 Acq. Method Set: GenGrad  
 Processing Method: Default  
 Channel Name: 254.0nm  
 Proc. Chnl. Descr.: PDA 254.0 nm

**Bis4: Piv-Ala-(NMe-D-BrTyr)-(4-MePro-Tz)-Ala-(NMe-Phe)-Opp**

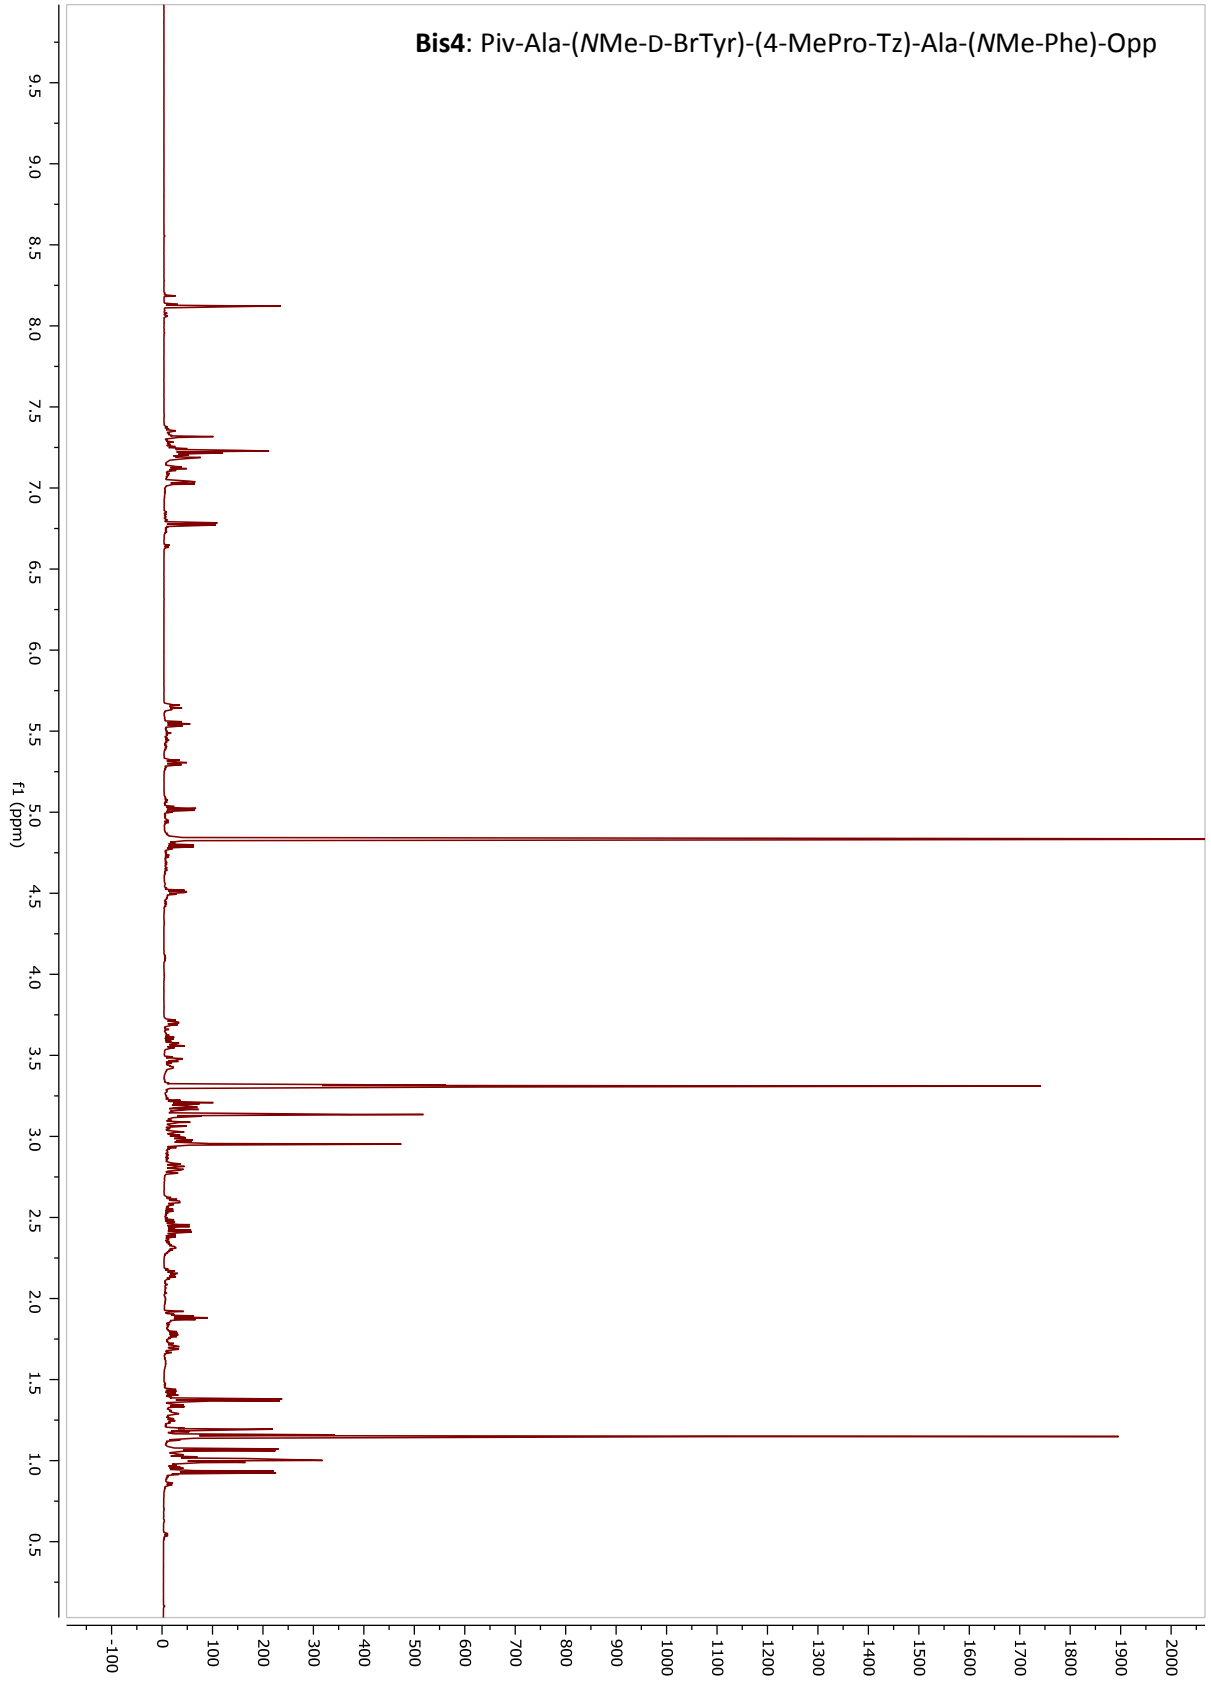

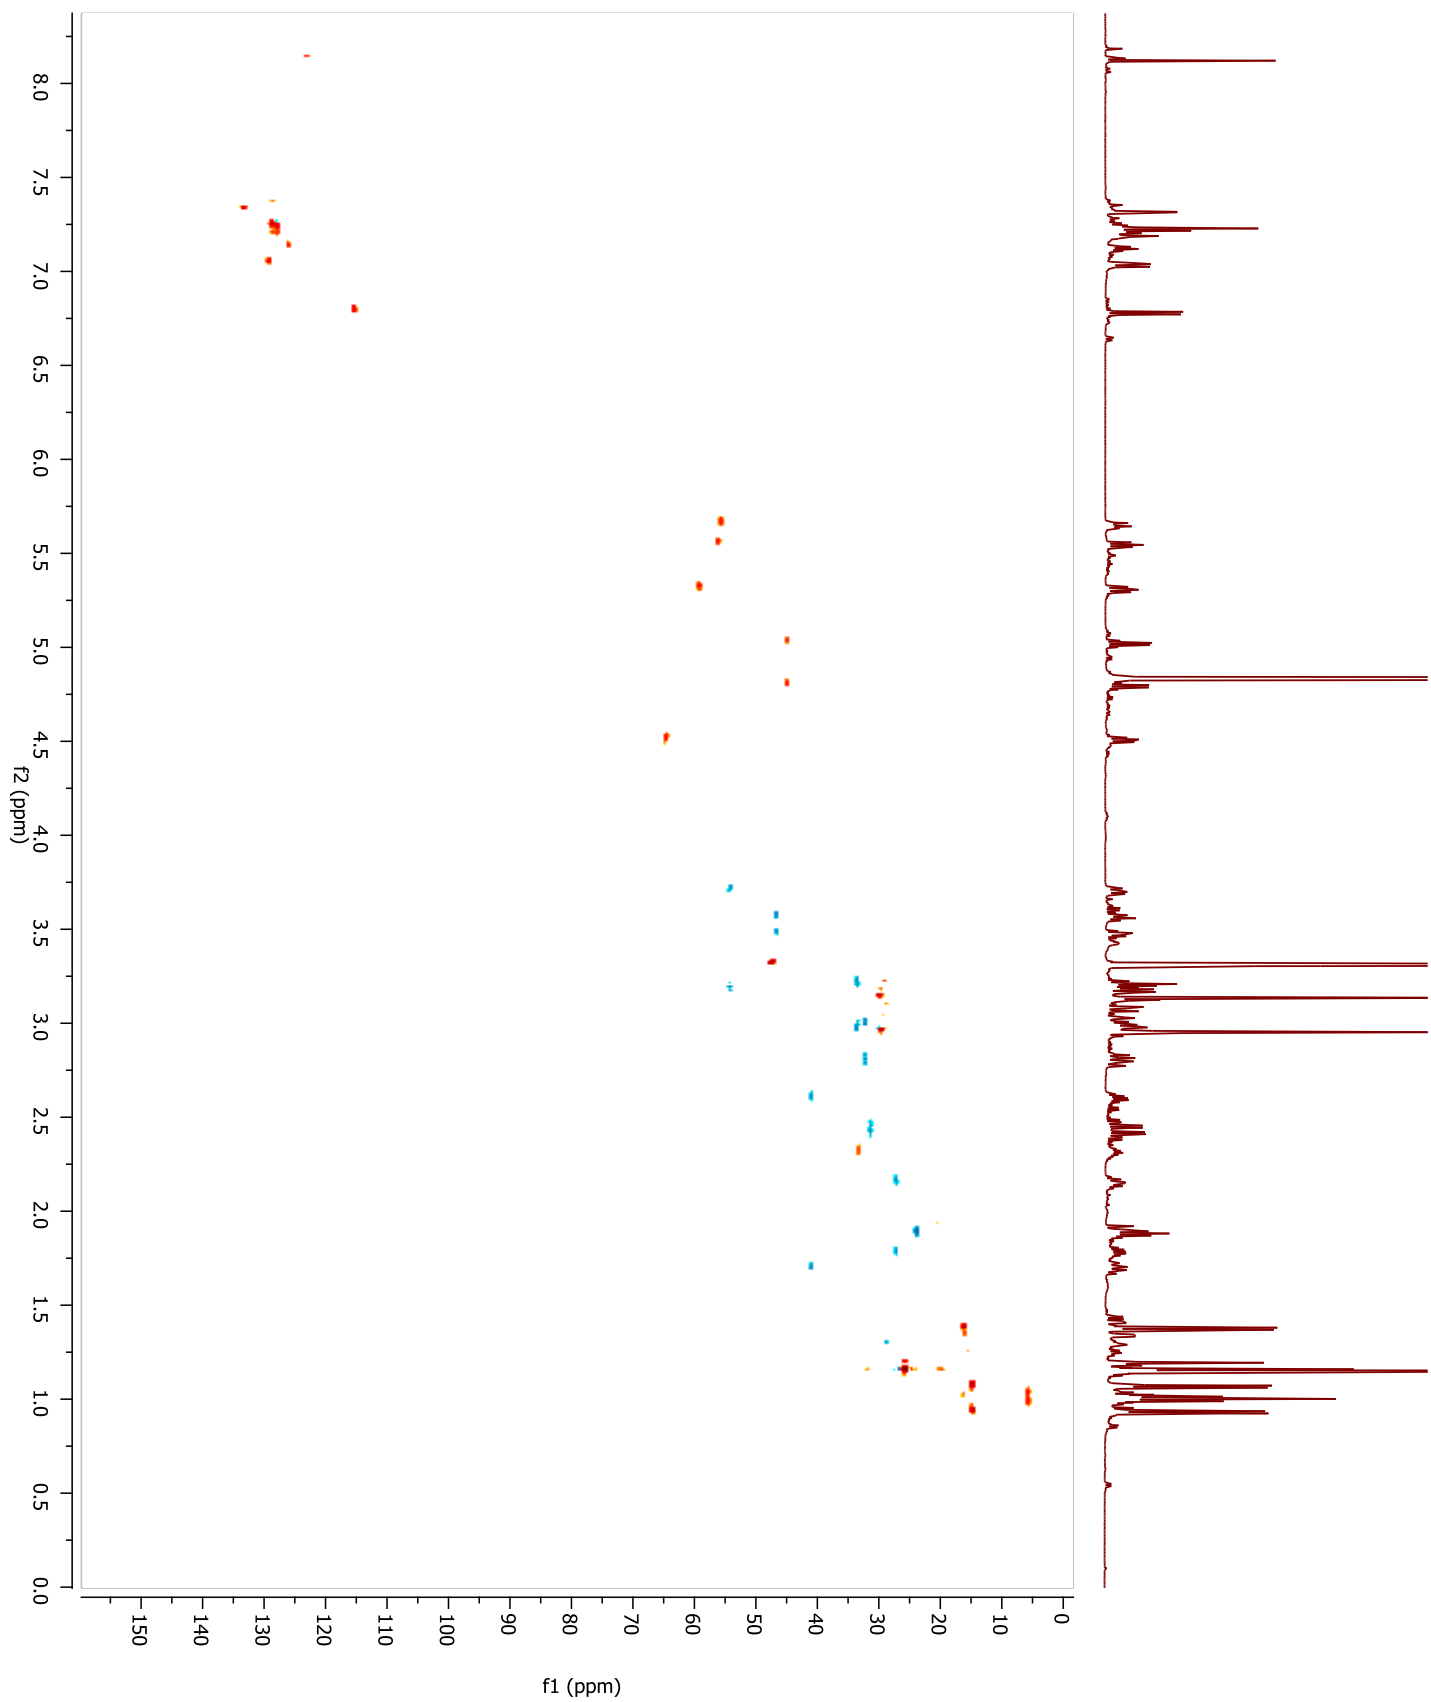



Piv-Ala-Ala-(4-MePro-Tz)-(D-Leu)-(NMe-Phe)-Opp Bis5

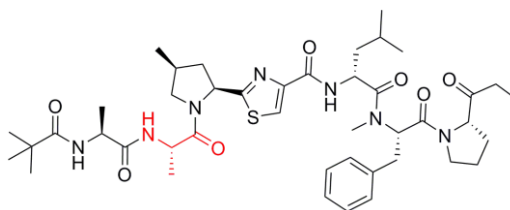

| Amino Acid     | Position                | $\delta$ (500 MHz) | integration | multiplicity | $J$ (Hz)   |
|----------------|-------------------------|--------------------|-------------|--------------|------------|
| <b>Opp</b>     | $\alpha$ -CH            | 4.55               | 1           | dd           | 9.0, 4.5   |
|                | $CH_A H_B$              | 2.19 – 2.09        | 1           | m            | -          |
|                | $CH_A H_B$              | 1.83 – 1.77        | 1           | m            | -          |
|                | $CH_2$                  | 1.90 – 1.83        | 2           | m            | -          |
|                | N $CH_2$                | 3.64 – 3.50        | 2           | m            | -          |
|                | $CH_2 CH_3$             | 2.55 – 2.49        | 2           | m            | -          |
|                | $CH_2 CH_3$             | 1.03               | 3           | t            | 7.3        |
| <b>Phe</b>     | $\alpha$ -CH            | 5.78               | 1           | dd           | 10.5, 5.7  |
|                | $CH_A H_B$              | 3.14               | 1           | dd           | 14.6, 5.7  |
|                | $CH_A H_B$              | 3.04               | 1           | dd           | 14.6, 10.5 |
|                | ArH                     | 7.33 – 7.16        | 5           | m            | -          |
|                | N- $CH_3$               | 3.09               | 3           | s            | -          |
| <b>Leu</b>     | $\alpha$ -CH            | 4.88               | 1           | dd           | 10.4, 3.9  |
|                | $CH_A H_B$              | 1.22 – 1.17        | 1           | m            | -          |
|                | $CH_A H_B$              | 0.92 – 0.86        | 1           | m            | -          |
|                | CH                      | 1.41 – 1.36        | 1           | m            | -          |
|                | $CH_3$                  | 0.85               | 3           | d            | 6.5        |
|                | $CH_3$                  | 0.80               | 3           | d            | 6.7        |
| <b>MeProTz</b> | $\alpha$ -CH            | 5.35 – 5.24        | 1           | m            | -          |
|                | $\alpha$ -CH $CH_A H_B$ | 2.71 – 2.61        | 1           | m            | -          |
|                | $\alpha$ -CH $CH_A H_B$ | 1.77 – 1.69        | 1           | m            | -          |
|                | $CHCH_3$                | 2.50 – 2.42        | 1           | m            | -          |
|                | $CHCH_3$                | 1.13               | 3           | d            | 6.6        |
|                | N $CH_X H_Y$            | 4.18               | 1           | dd           | 9.9, 7.0   |
|                | N $CH_X H_Y$            | 3.34 – 3.27        | 1           | m            | -          |
|                | ArH                     | 8.06               | 1           | s            | -          |
| <b>Ala</b>     | $\alpha$ -CH            | 4.69               | 1           | q            | 7.0        |
|                | $CH_3$                  | 1.35               | 3           | d            | 7.0        |
| <b>Ala</b>     | $\alpha$ -CH            | 4.34               | 1           | q            | 7.2        |
|                | $CH_3$                  | 1.33               | 3           | d            | 7.2        |
| <b>Piv</b>     | $(CH_3)_3$              | 1.19               | 9           | s            | -          |

Yield 17.1 mg, 3% (Semicarbazide resin).  $R_t$  (Method B) = 29.0 min;  $^{13}\text{C}$  NMR  $\delta$  (151MHz, MeOD) 211.36 (C), 181.19 (C), 175.41 (C), 174.94 (C), 174.51 (C), 173.4 (C), 170.16 (C), 162.76 (C), 149.45 (C), 138.06 (C), 130.61 (2  $\times$  CH), 129.49 (2  $\times$  CH), 127.86 (CH), 124.80 (CH), 66.50 (CH), 60.91 (CH), 56.77 (CH), 55.80 (CH<sub>2</sub>), 50.39 (CH), (2  $\times$  CH + 1  $\times$  CH<sub>2</sub> obscured by solvent peak, visible in HSQC spectrum), 42.47 (CH<sub>2</sub>), 41.66 (CH<sub>2</sub>), 39.56 (C), 35.60 (CH<sub>2</sub>), 35.30 (CH), 33.54 (CH<sub>2</sub>), 31.31 (CH<sub>3</sub>), 29.05 (CH<sub>2</sub>), 27.72 (3  $\times$  CH<sub>3</sub>), 25.83 (CH), 25.69 (CH<sub>2</sub>), 23.57 (CH<sub>3</sub>), 21.81 (CH<sub>3</sub>), 18.06 (CH<sub>3</sub>), 17.13 (CH<sub>3</sub>), 16.98 (CH<sub>3</sub>), 7.74 (CH<sub>3</sub>);  $m/z$  (ESI+, MeOH) 844 ([M+Na]<sup>+</sup>, 100%), 434 (11); HRMS (ESI+, MeOH) [M+Na]<sup>+</sup> found 844.4367, C<sub>43</sub>H<sub>63</sub>N<sub>7</sub>O<sub>7</sub>SNa requires 844.4402.

### Bise 5

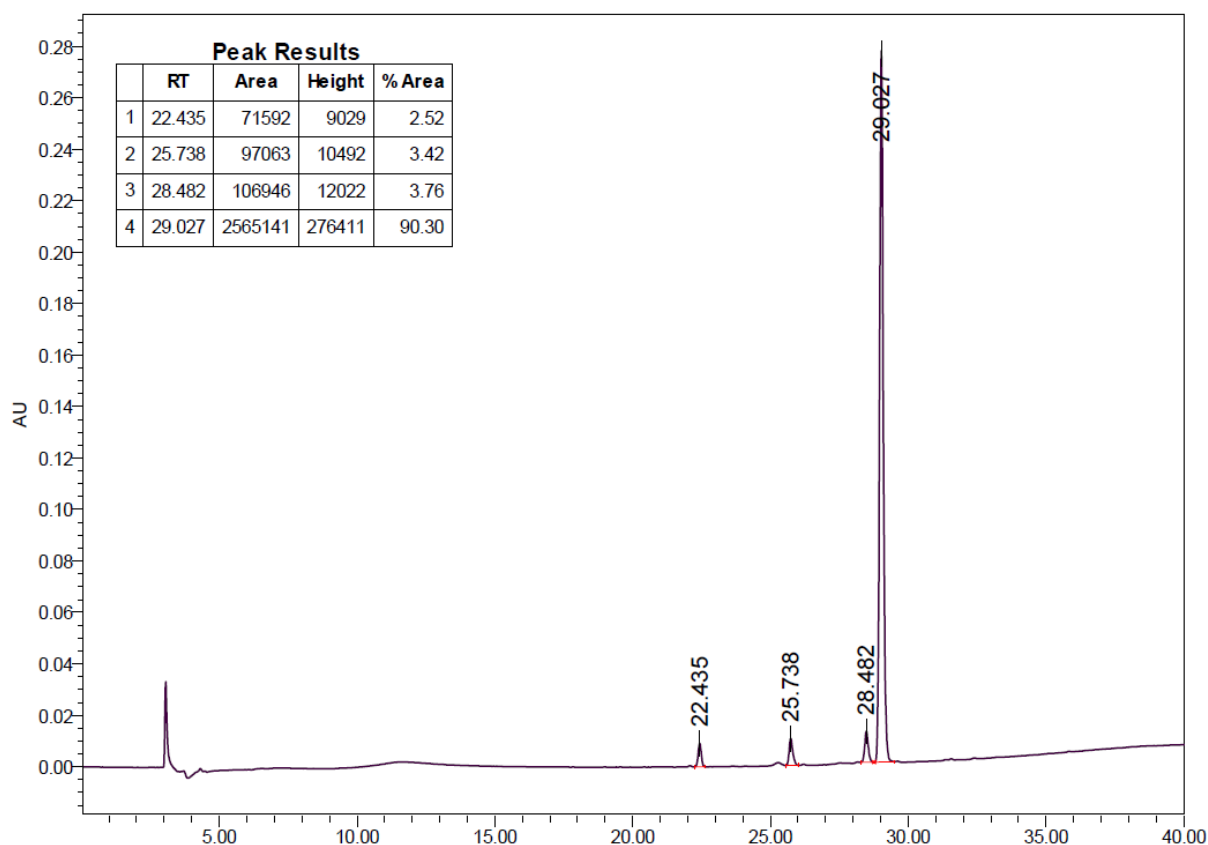

Sample Name: Bise5  
 Sample Type: Unknown  
 Vial: 5  
 Injection #: 1  
 Injection Volume: 10.00 ul  
 Run Time: 50.0 Minutes

Acquired By: System  
 Sample Set Name: Bise5  
 Acq. Method Set: GenGrad  
 Processing Method: FM00352098Run1  
 Channel Name: 254.0nm  
 Proc. Chnl. Descr.: PDA 254.0 nm

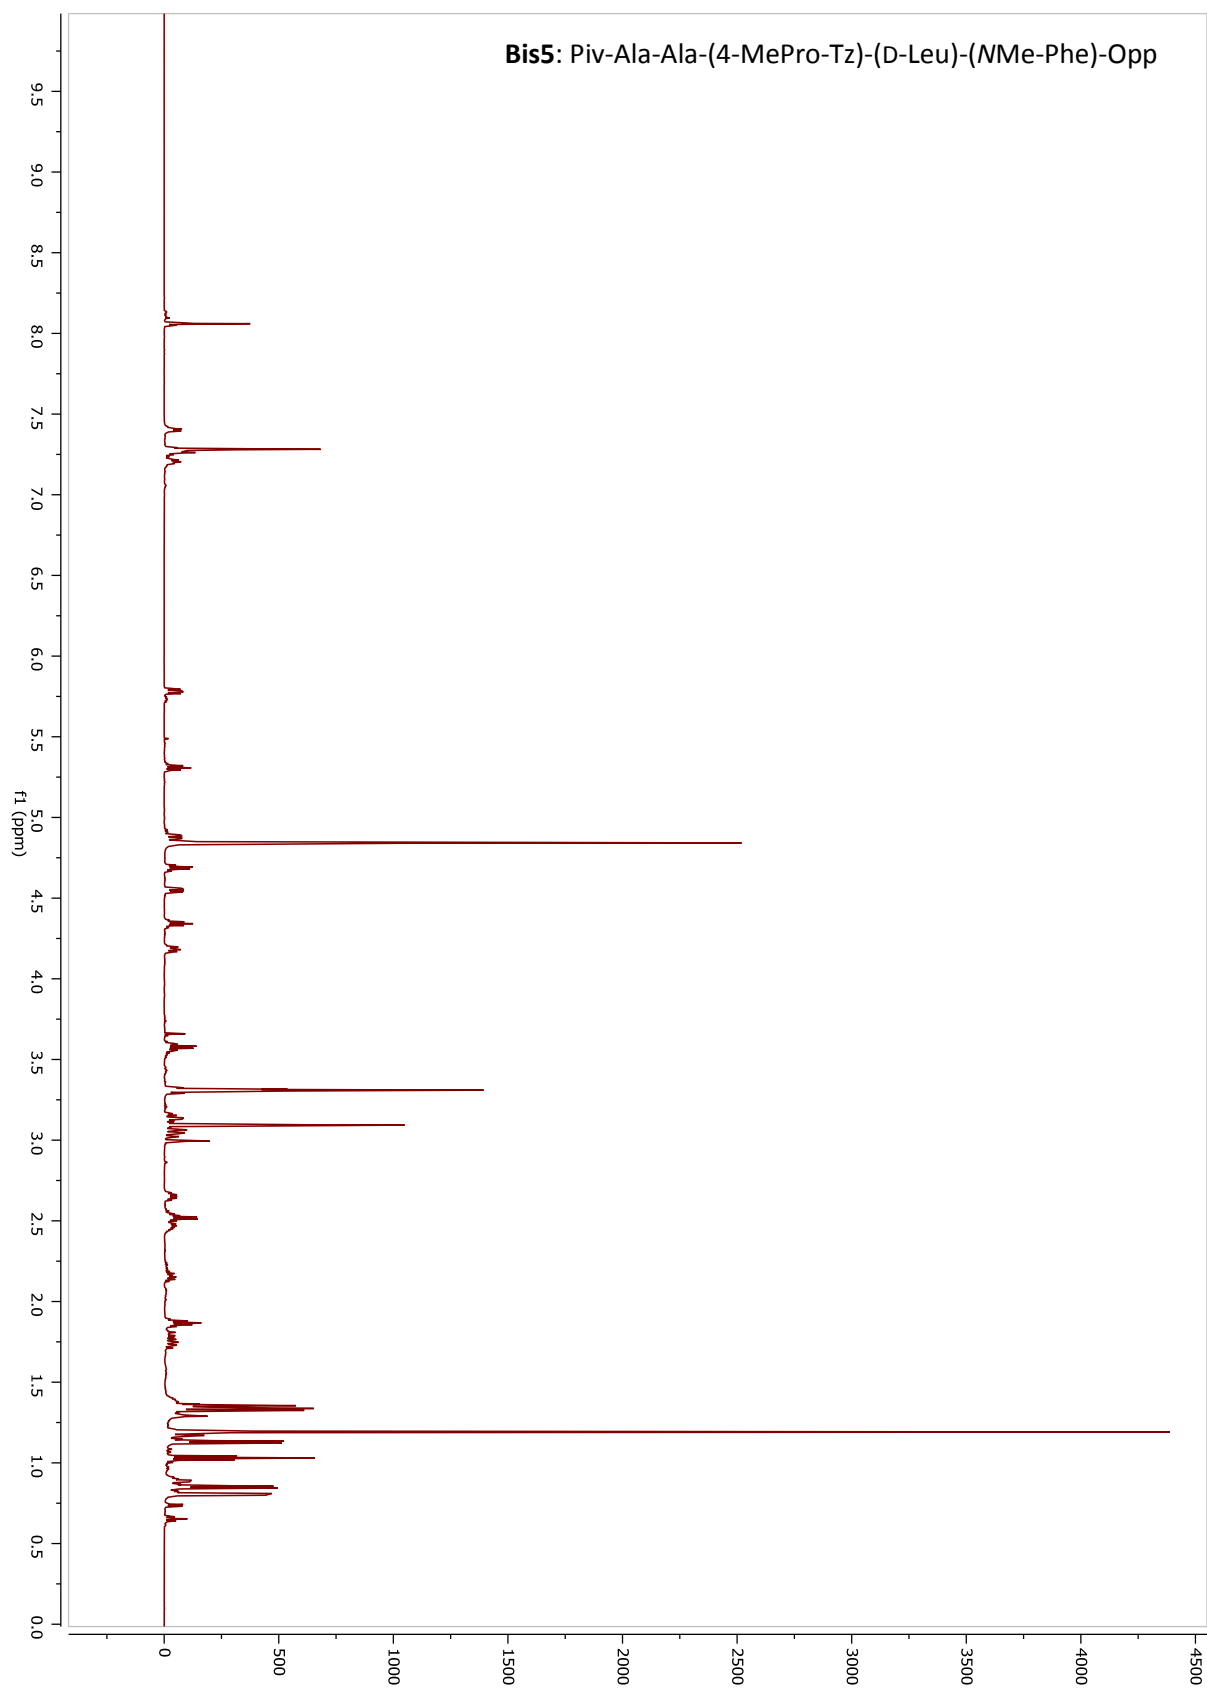

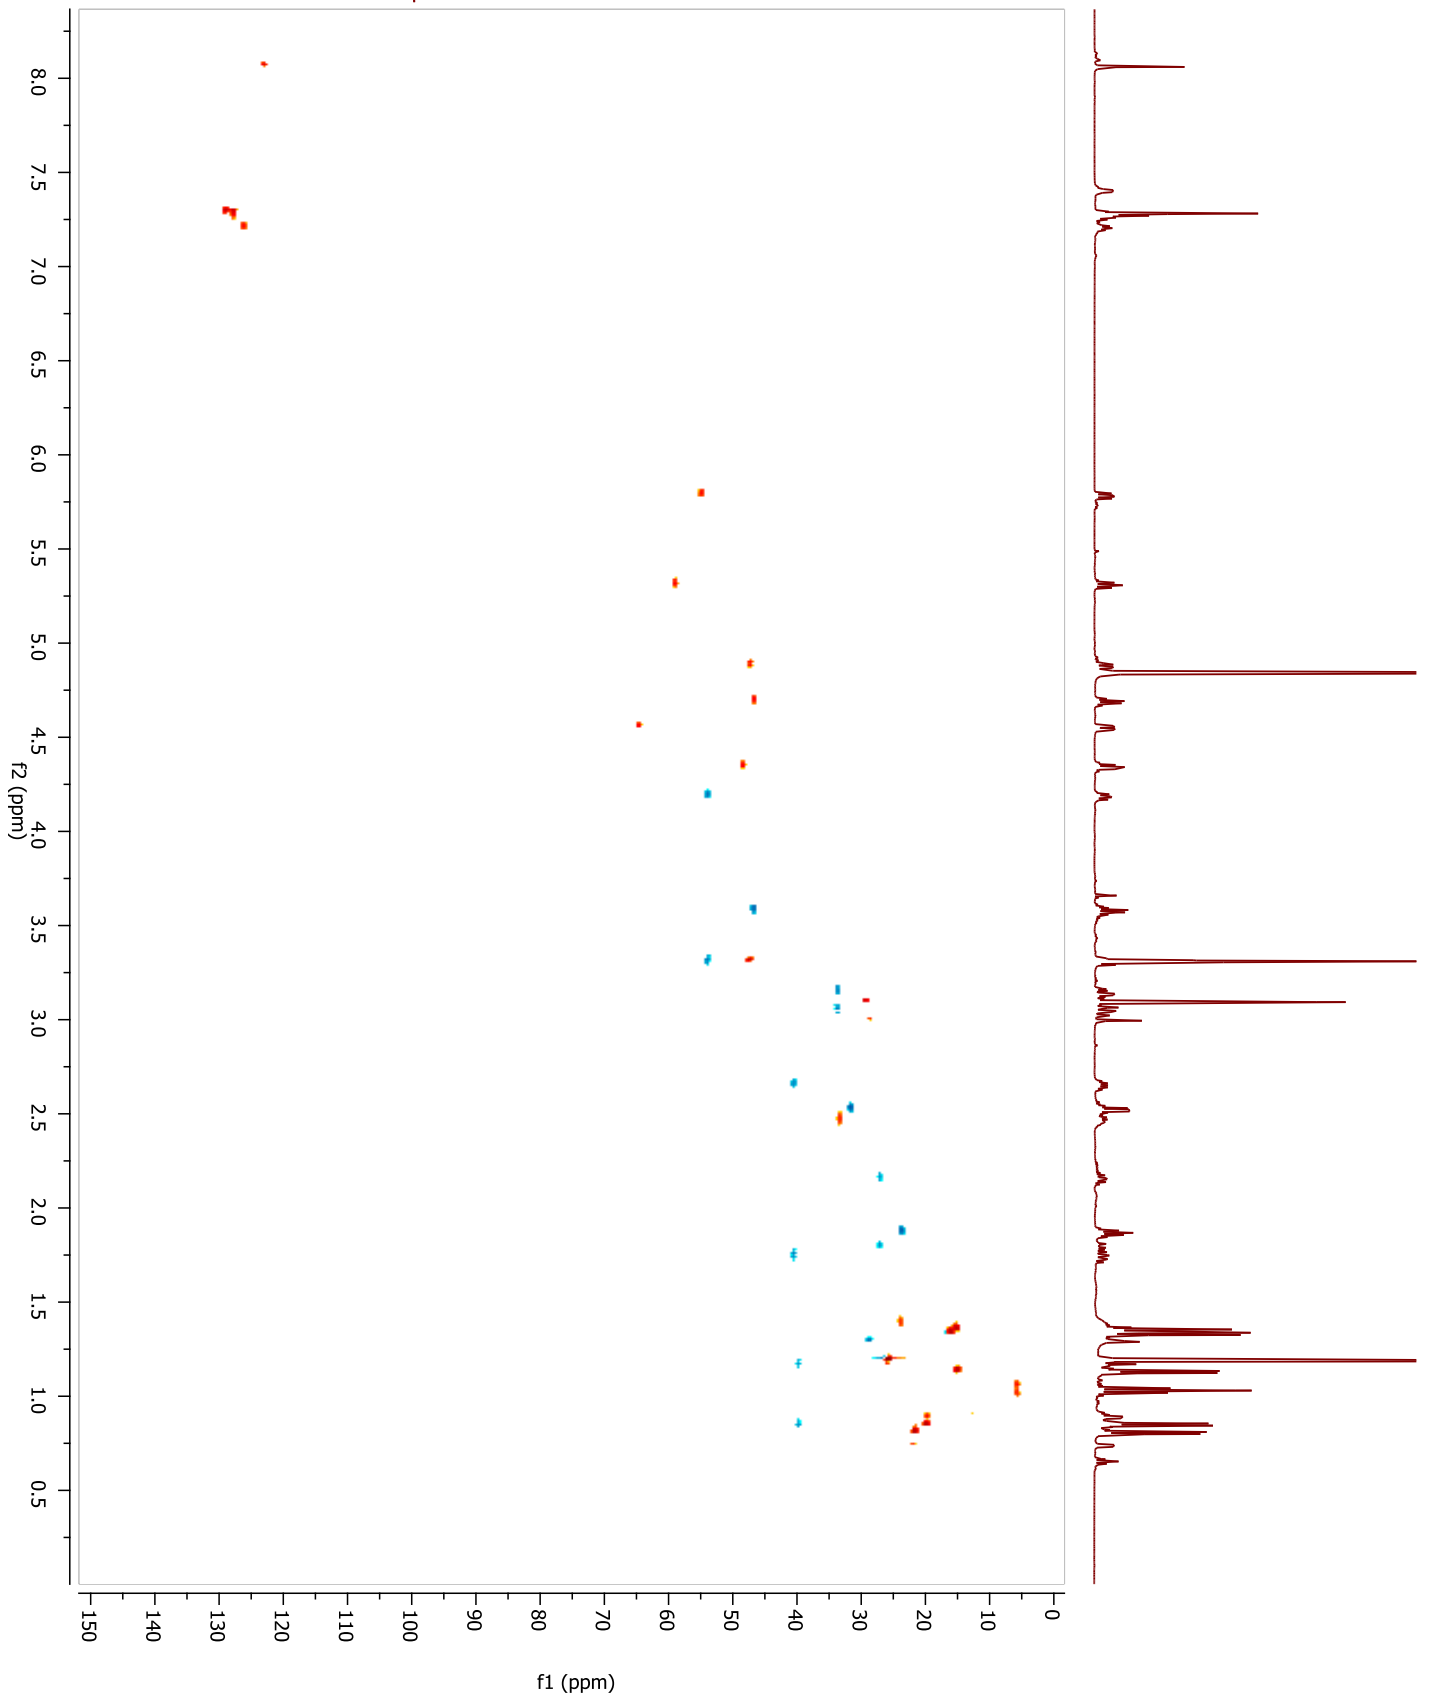

**Ac-Ala-(NMe-D-BrTyr)-(4-MePro-Tz)-(D-Leu)-(NMe-Phe)-Opp**

**Bis6**

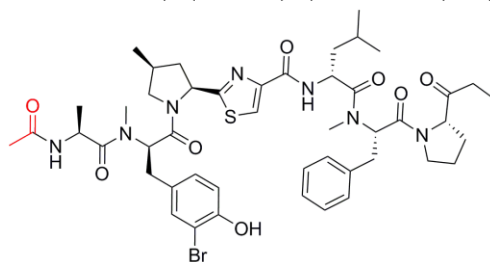

| Amino Acid     | Position               | $\delta$ (500 MHz) | integration | multiplicity | $J$ (Hz)   |
|----------------|------------------------|--------------------|-------------|--------------|------------|
| <b>Opp</b>     | $\alpha$ -CH           | 4.56               | 1           | dd           | 8.9, 4.4   |
|                | $CH_AH_B$              | 2.22 – 2.11        | 1           | m            | -          |
|                | $CH_AH_B$              | 1.84 – 1.75        | 1           | m            | -          |
|                | $CH_2$                 | 1.90 – 1.84        | 2           | m            | -          |
|                | $NCH_2$                | 3.63 – 3.56        | 2           | m            | -          |
|                | $CH_2CH_3$             | 2.55 – 2.48        | 2           | m            | -          |
|                | $CH_2CH_3$             | 1.03               | 3           | t            | 7.3        |
| <b>Phe</b>     | $\alpha$ -CH           | 5.79               | 1           | dd           | 10.5, 5.7  |
|                | $CH_AH_B$              | 3.13 – 3.09        | 1           | m            | -          |
|                | $CH_AH_B$              | 3.08 – 3.02        | 1           | m            | -          |
|                | ArH                    | 7.30 – 7.17        | 5           | m            | -          |
|                | N- $CH_3$              | 3.10               | 3           | s            | -          |
| <b>Leu</b>     | $\alpha$ -CH           | 4.88               | 1           | dd           | 10.5, 3.8  |
|                | $CH_AH_B$              | 1.26 – 1.15        | 1           | m            | -          |
|                | $CH_AH_B$              | 0.80 – 0.70        | 1           | m            | -          |
|                | CH                     | 1.49 – 1.35        | 1           | m            | -          |
|                | $CH_3$                 | 0.86               | 3           | d            | 6.5        |
|                | $CH_3$                 | 0.81               | 3           | d            | 6.6        |
| <b>MeProTz</b> | $\alpha$ -CH           | 5.29               | 1           | dd           | 9.2, 7.8   |
|                | $\alpha$ -CH $CH_AH_B$ | 2.63 – 2.55        | 1           | m            | -          |
|                | $\alpha$ -CH $CH_AH_B$ | 1.75 – 1.66        | 1           | m            | -          |
|                | $CHCH_3$               | 2.36 – 2.24        | 1           | m            | -          |
|                | $CHCH_3$               | 1.05               | 3           | d            | 6.6        |
|                | $NCH_XH_Y$             | 3.72               | 1           | dd           | 10.9, 7.0  |
|                | $NCH_XH_Y$             | 3.18 – 3.13        | 1           | m            | -          |
|                | ArH                    | 8.07               | 1           | s            | -          |
| <b>BrTyr</b>   | $\alpha$ -CH           | 5.64               | 1           | dd           | 10.2, 5.5  |
|                | $CH_AH_B$              | 2.99               | 1           | dd           | 14.5, 5.5  |
|                | $CH_AH_B$              | 2.78               | 1           | dd           | 14.5, 10.2 |
|                | ArH                    | 7.31               | 1           | d            | 2.0        |
|                |                        | 7.02               | 1           | dd           | 8.3, 2.0   |
|                |                        | 6.77               | 1           | d            | 8.3        |
|                | N- $CH_3$              | 2.96               | 3           | s            | -          |
| <b>Ala</b>     | $\alpha$ -CH           | 4.62               | 1           | q            | 7.1        |
|                | $CH_3$                 | 0.94               | 3           | d            | 7.1        |
| <b>Ac</b>      | $CH_3$                 | 1.92               | 3           | s            | -          |

Yield 16.2 mg, 2% (Semicarbazide resin). **R<sub>t</sub>** (Method B) = 27.7 min; <sup>13</sup>C NMR δ (126 MHz, MeOD) 211.41 (C), 175.14 (C), 174.97 (C), 174.44 (C), 172.52 (C), 170.86 (C), 170.21 (C), 163.00 (C), 154.10 (C), 149.61 (C), 138.12 (C), 134.97 (CH), 130.91 (CH), 130.85 (C), 130.63 (2 × CH), 129.48 (2 × CH), 127.84 (CH), 125.01 (CH), 116.98 (CH), 110.37 (C), 66.53 (CH), 61.22 (CH), 57.67 (CH), 56.73 (CH), 56.05 (CH<sub>2</sub>), (1 × CH + 1 × CH<sub>2</sub> obscured by solvent peak, visible in HSQC spectrum), 46.67 (CH), 42.66 (CH<sub>2</sub>), 41.42 (CH<sub>2</sub>), 35.62 (CH<sub>2</sub>), 35.09 (CH), 34.21 (CH<sub>2</sub>), 33.54 (CH<sub>2</sub>), 31.55 (CH<sub>3</sub>), 31.26 (CH<sub>3</sub>), 29.07 (CH<sub>2</sub>), 25.85 (CH), 25.71 (CH<sub>2</sub>), 23.60 (CH<sub>3</sub>), 22.24 (CH<sub>3</sub>), 21.73 (CH<sub>3</sub>), 16.60 (2 × CH<sub>3</sub>), 7.74 (CH<sub>3</sub>); **m/z** (ESI+, MeOH) 988 ([<sup>81</sup>BrM+Na]<sup>+</sup>, 100%), 986 ([<sup>79</sup>BrM+Na]<sup>+</sup>, 89), 503 (15), 391 (11), 197 (14); **HRMS** (ESI+, MeOH) [<sup>79</sup>BrM+Na]<sup>+</sup> found 986.3453, C<sub>47</sub>H<sub>62</sub>N<sub>7</sub>O<sub>8</sub>S<sup>79</sup>BrNa requires 986.3456.

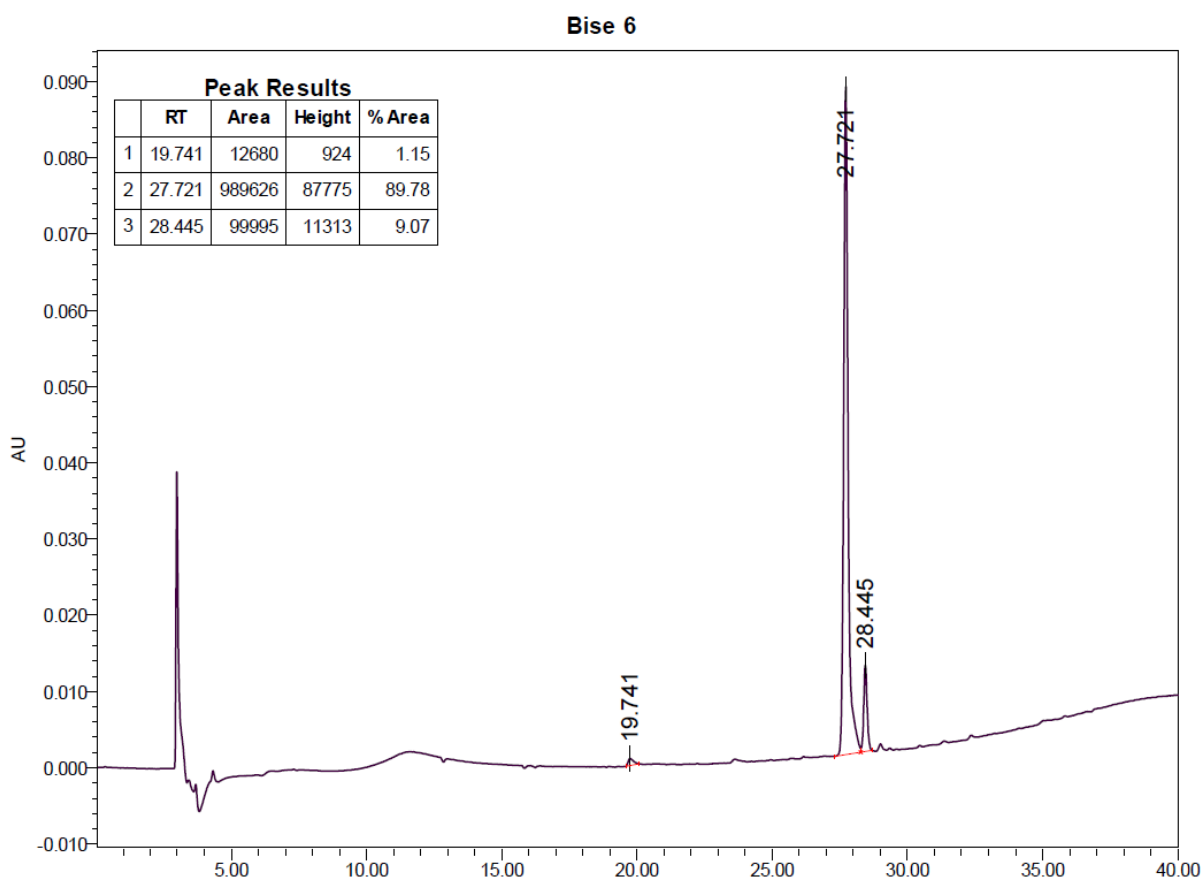

Sample Name: Bise6  
 Sample Type: Unknown  
 Vial: 6  
 Injection #: 1  
 Injection Volume: 10.00 ul  
 Run Time: 50.0 Minutes

Acquired By: System  
 Sample Set Name: Bise6  
 Acq. Method Set: GenGrad  
 Processing Method: FM00352098Run1  
 Channel Name: 254.0nm  
 Proc. Chnl. Descr.: PDA 254.0 nm

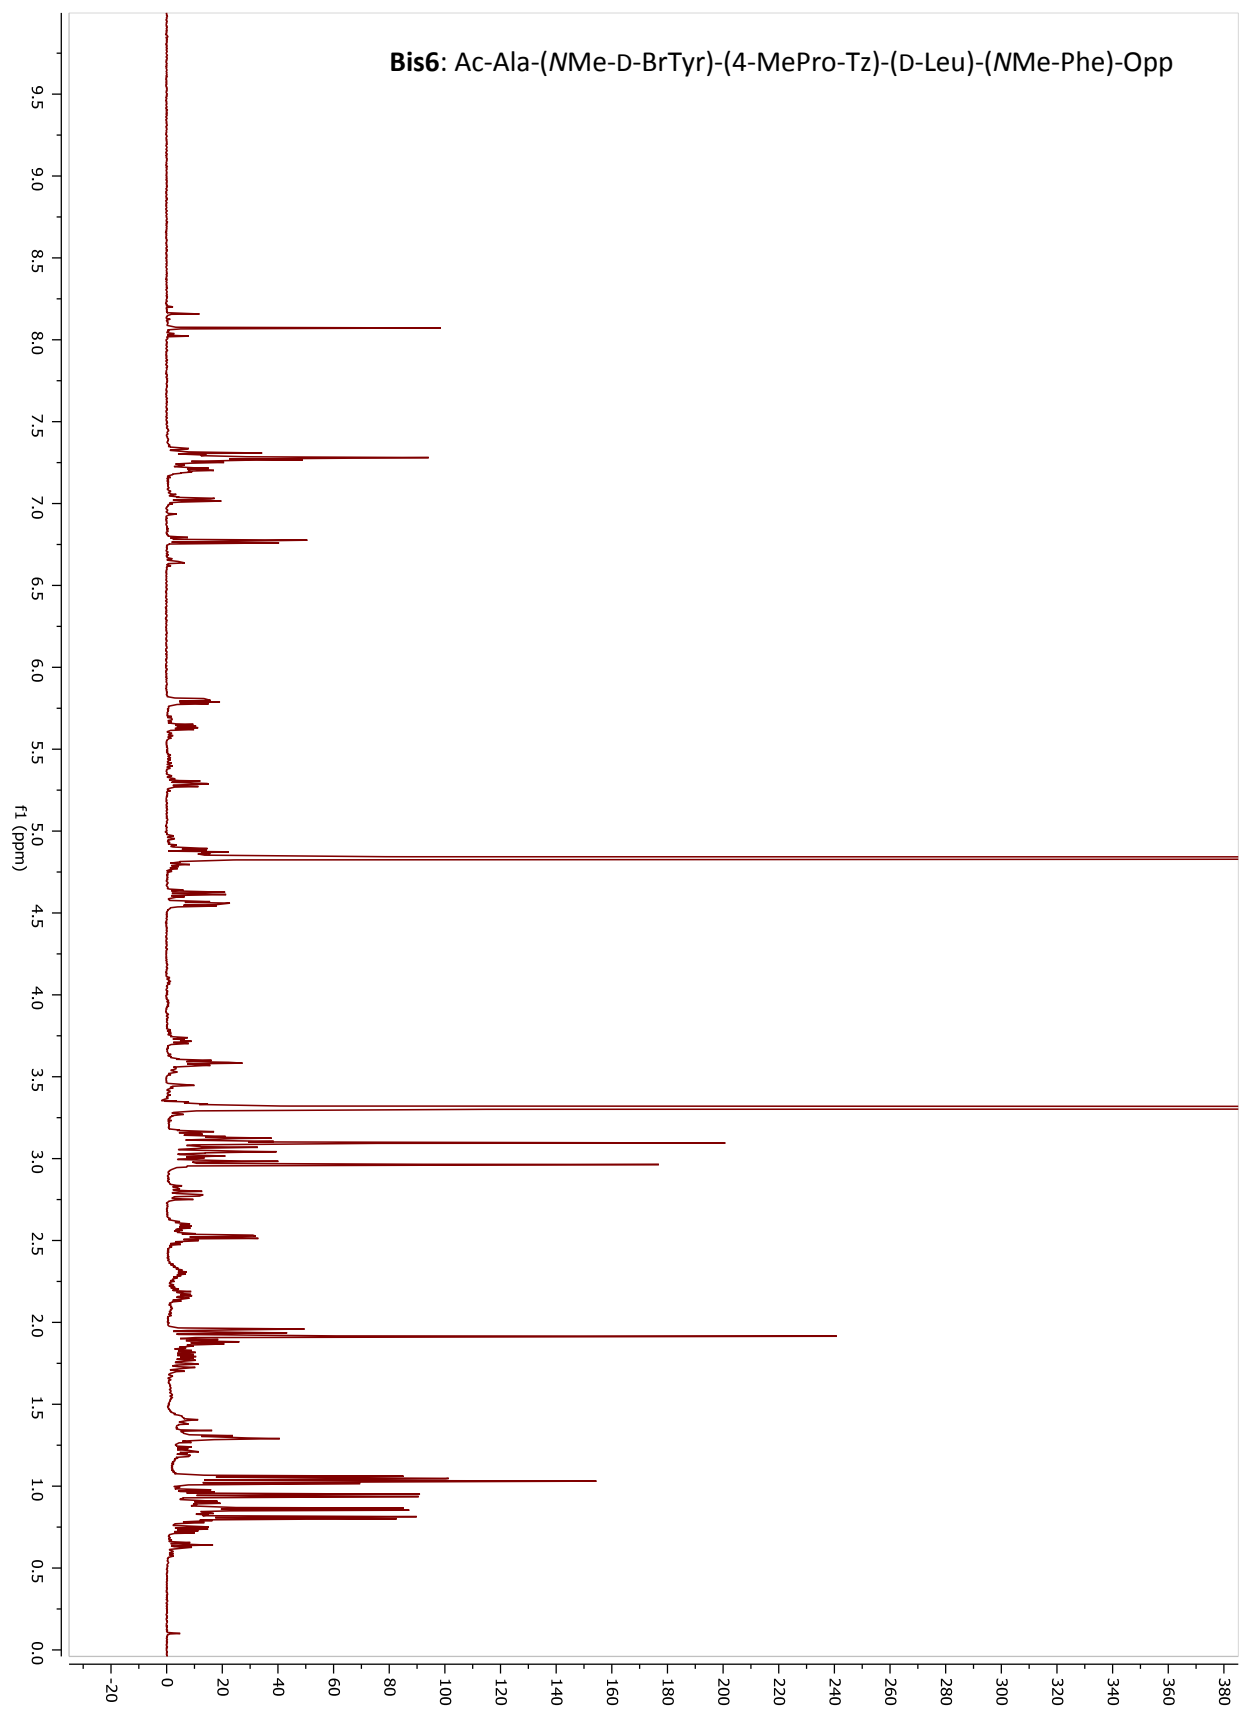

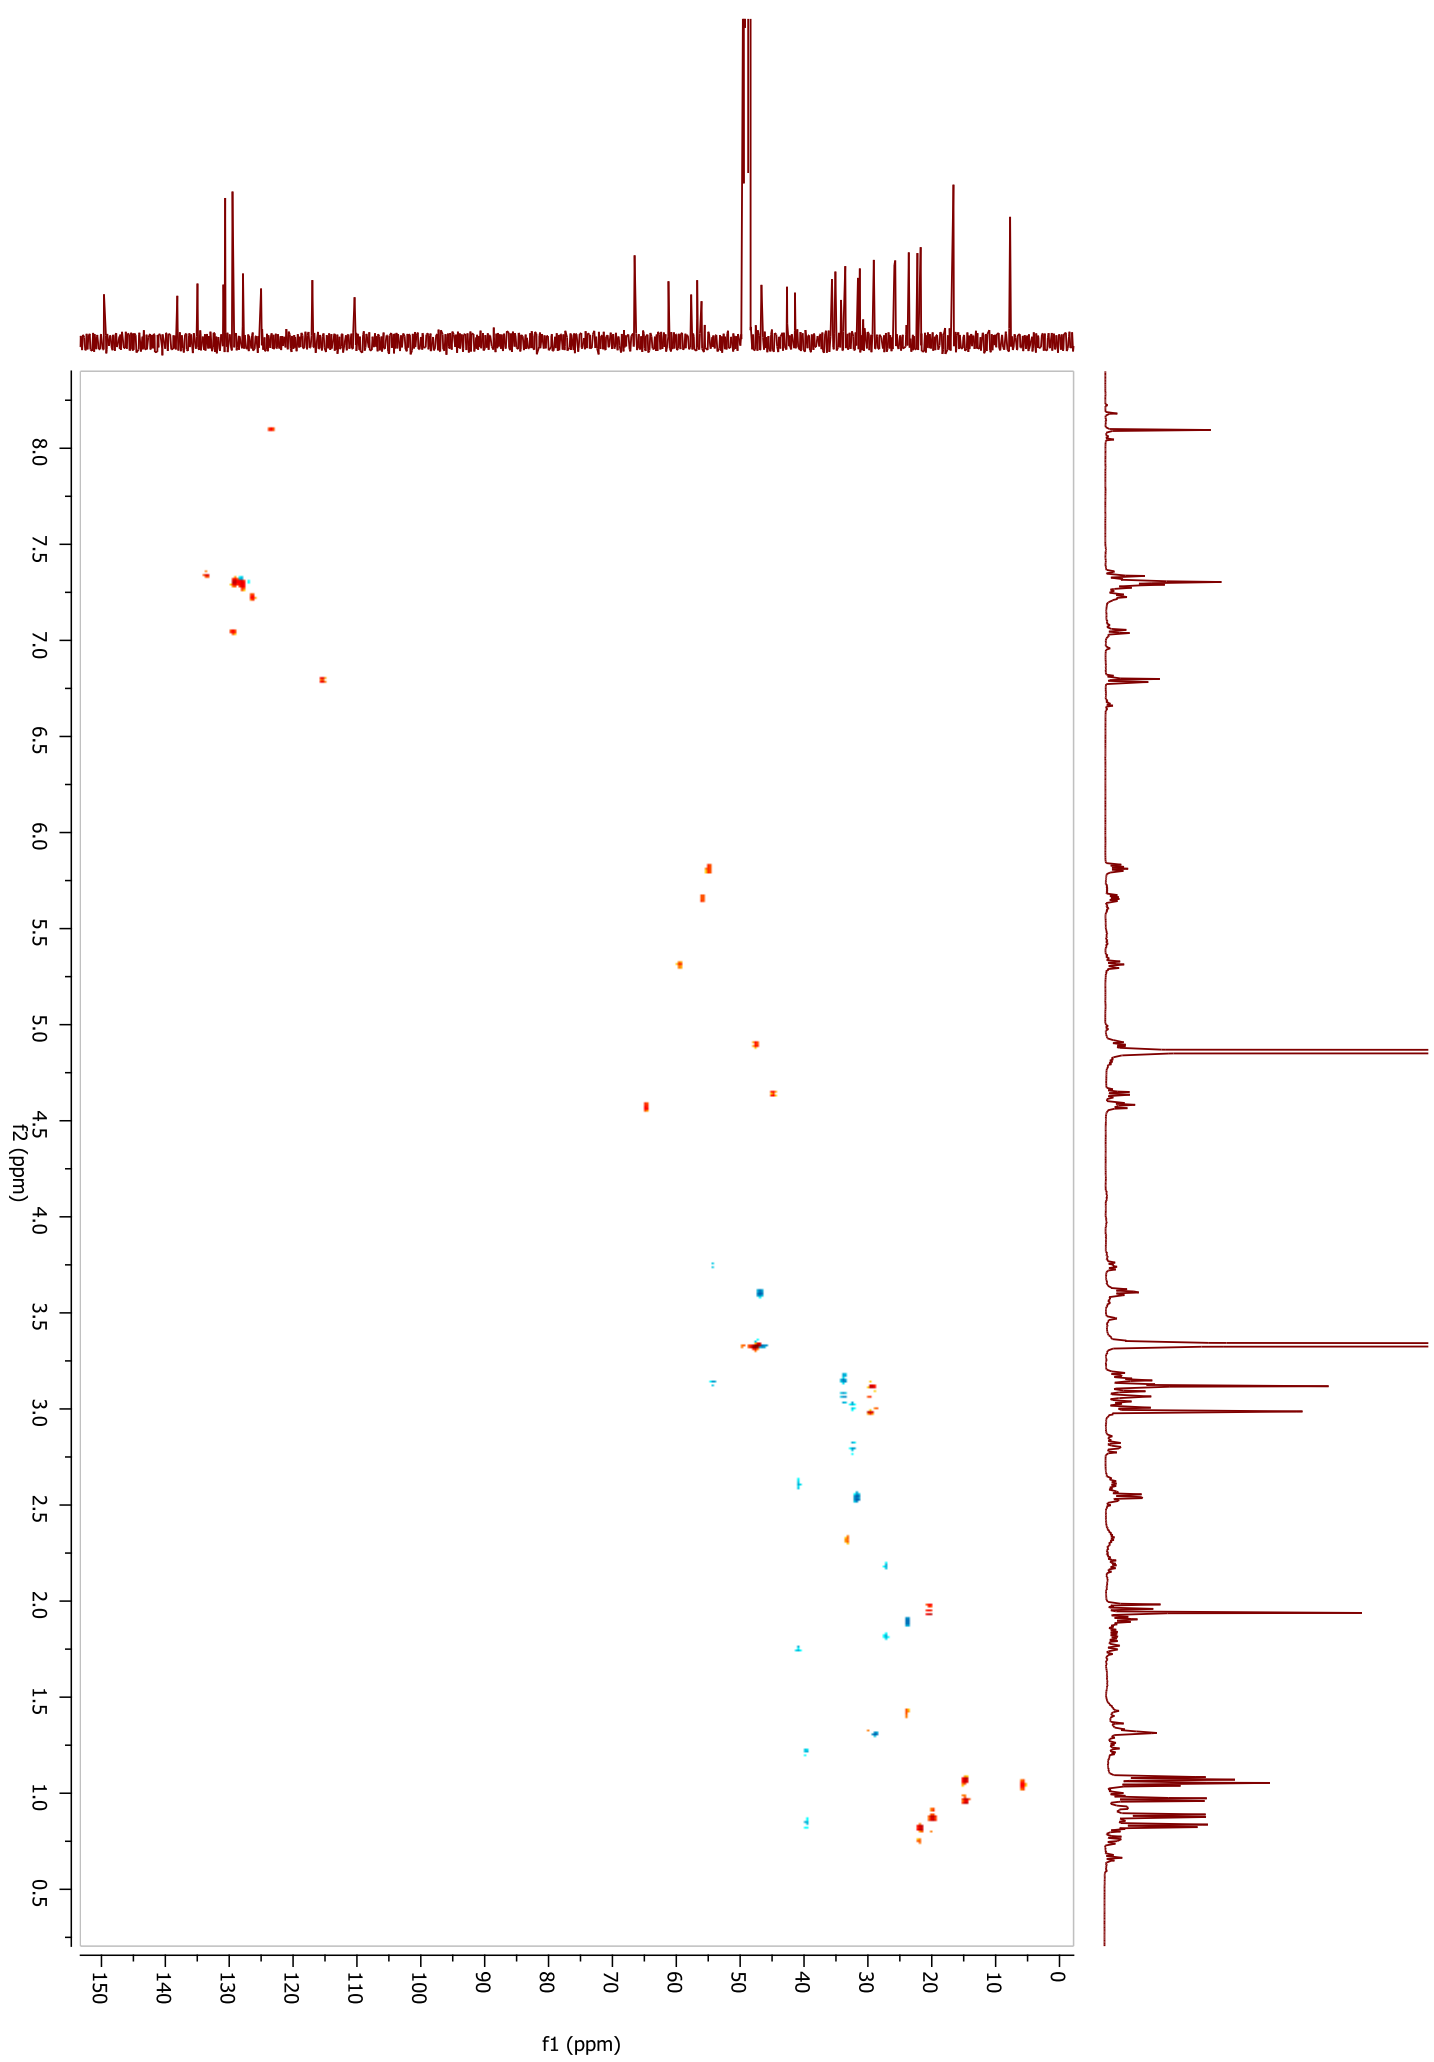



## 1.7 Data for High Content Imaging Assays

### A. Confluence (cell growth)

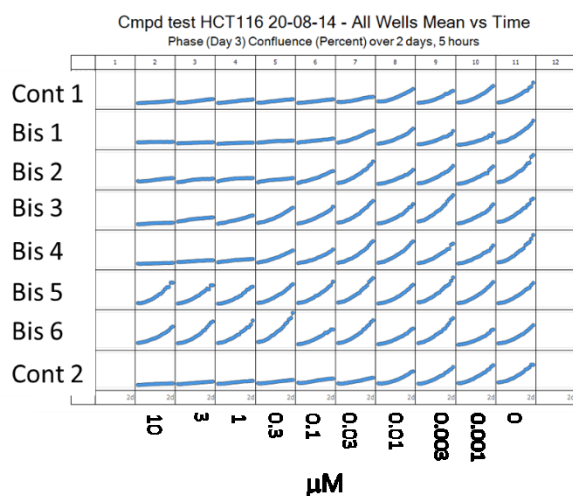

### Apoptosis (caspase activity)

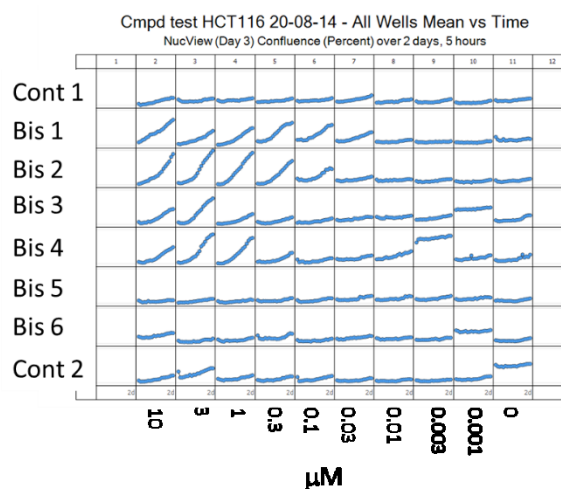

### B.

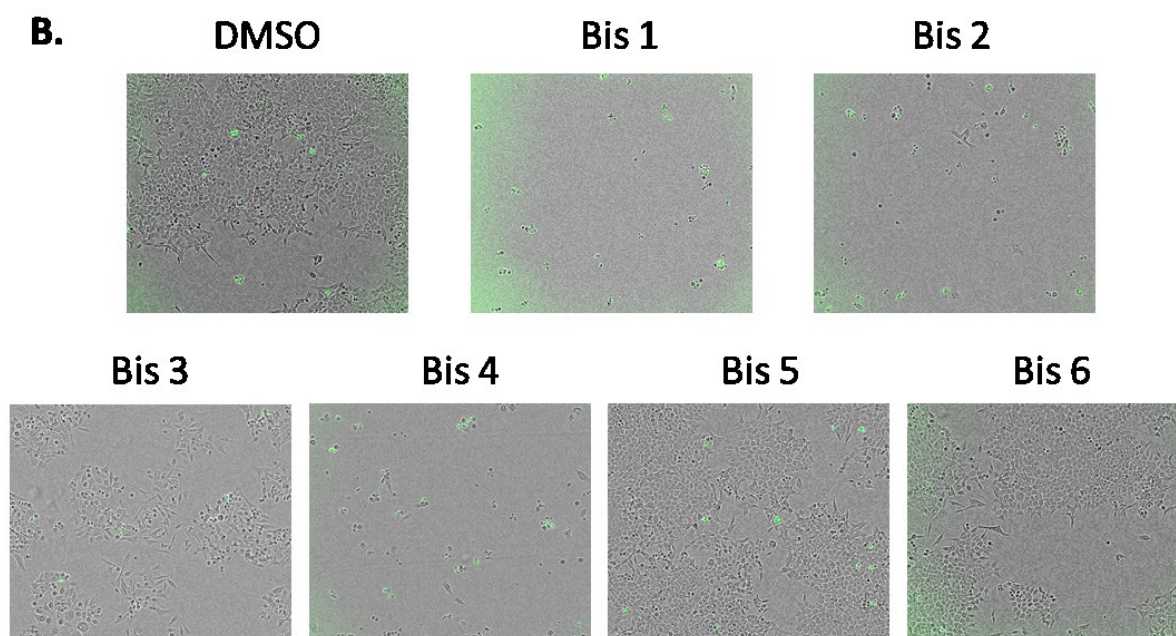

**Figure S1.** Kinetic cancer cell growth and apoptosis assays. (A) HCT116 cells seeded in 96-well plates were treated with a 9-point half-log dose response of each Bis analogue (10-0.001  $\mu\text{M}$ ) and placed in the IncuCyte-ZOOM live cell imaging platform. Cell growth (left) and apoptosis (right) measurements were recorded at sequential 3 h timepoints following compound addition using the confluence image analysis algorithm applied to brightfield images (left) and the NucView<sup>TM</sup> caspase biosensor positive pixels (right). Platemarks shown represent kinetic profiles for cell growth and apoptosis in each well of the 96-well microtitre plate, time course data is represented in the X-axis and percentage confluence and apoptosis, per-field-of-view, are represented on the Y-axis of each microtitre plate well. Controls include: Cont 1 (Dasatinib, Src kinase inhibitor) and Cont 2 (in-house compound) and “0” (DMSO vehicle alone). (B) Representative IncuCyte images selected after 124 h incubation with 0.3  $\mu\text{M}$  Bis1-6 or DMSO control demonstrating cell confluence and the proportion of apoptotic (caspase-positive = Green) cells. (Cont 1 and Cont 2 images not shown). The IncuCyte kinetic profiling data presented in this figure is derived from a single phenotypic profiling experiment, which is representative of multiple replicate experiments performed across separate weeks.

## 1.8 Data for Reverse Phase Protein Microarray Assays

**Table S1.** Protein modifications detected by RPPA and antibody detected analytes – with supplier information and catalogue numbers

| Analyte                             | Supplier                    | Catalogue Number |
|-------------------------------------|-----------------------------|------------------|
| AMPK alpha                          | Cell Signaling Technologies | 2532             |
| Aurora A/B/C P Thr288/Thr232/Thr198 | Cell Signaling Technologies | 2914             |
| E-Cadherin                          | Cell Signaling Technologies | 3195             |
| ErbB-2/Her2/EGFR P Tyr1248/Tyr1173  | Cell Signaling Technologies | 2244             |
| IKK alpha/beta P Ser176/Ser177      | Cell Signaling Technologies | 2078             |
| mTOR                                | Cell Signaling Technologies | 2972             |
| mTOR P Ser2448                      | Cell Signaling Technologies | 2971             |
| NFkB p65 Ser536                     | Cell Signaling Technologies | 3033             |
| PLC-gamma1 P Tyr783                 | Cell Signaling Technologies | 2821             |
| SHP2 P Tyr542                       | Cell Signaling Technologies | 3751             |
| 4E-BP1 P Ser65                      | Cell Signaling Technologies | 9451             |
| Akt                                 | Cell Signaling Technologies | 9272             |
| Akt P Ser473                        | Cell Signaling Technologies | 4060             |
| Akt P Thr308                        | Cell Signaling Technologies | 2965             |
| AMPK alpha P Thr172                 | Cell Signaling Technologies | 2535             |
| Bad P Ser112                        | Cell Signaling Technologies | 9291             |
| Bcl-2                               | Epitomics                   | 1017-1           |
| beta-Catenin                        | Cell Signaling Technologies | 9562             |
| Bid                                 | Epitomics                   | 1008             |
| Bim P Ser69                         | Cell Signaling Technologies | 4585             |
| Caspase 3                           | Cell Signaling Technologies | 9662             |
| Caspase 3 cleaved                   | Cell Signaling Technologies | 9664             |
| Chk1 P Ser345                       | Cell Signaling Technologies | 2348             |
| Cyclin D1 P Thr286                  | Cell Signaling Technologies | 3300             |
| FLT3 P Tyr591 P Tyr591              | Cell Signaling Technologies | 3461             |
| GSK-3-alpha/beta P Ser21/Ser9       | Cell Signaling Technologies | 9331             |
| GSK-3-beta                          | Cell Signaling Technologies | 9315             |
| IGF-1R                              | Cell Signaling Technologies | 3027             |
| IkB-alpha P Ser32                   | Cell Signaling Technologies | 2859             |
| LKB1                                | Cell Signaling Technologies | 3047             |
| MNK1 (MKNK) P Thr197, Thr202        | Cell Signaling Technologies | 2111             |
| p38 MAPK                            | Cell Signaling Technologies | 9212             |
| p38 MAPK PThr180, Tyr182            | Cell Signaling Technologies | 9211             |
| p44/42 MAPK (ERK1/2)                | Cell Signaling Technologies | 9102             |

|                                                 |                             |          |
|-------------------------------------------------|-----------------------------|----------|
| p44/42 MAPK (ERK1/2) P Thr202/Thr185,Tyr204/Sig | Cell Signaling Technologies | 4370     |
| p53 P Ser15                                     | Cell Signaling Technologies | 9284     |
| PARP                                            | Cell Signaling Technologies | 9542     |
| PARP cleaved Asp214                             | Cell Signaling Technologies | 9541     |
| PLC-gamma1                                      | Cell Signaling Technologies | 2822     |
| Rb P Ser780                                     | Cell Signaling Technologies | 9307     |
| Src                                             | Cell Signaling Technologies | 2109     |
| Src (family) P Tyr416                           | Cell Signaling Technologies | 2101     |
| XIAP                                            | Cell Signaling Technologies | 2045     |
| Bcl-x                                           | Epitomics                   | 1018     |
| beta-Catenin P Ser33,Ser37,Thr41                | Cell Signaling Technologies | 9561     |
| EGFR P Tyr1173                                  | Cell Signaling Technologies | 4407     |
| ErbB-1/EGFR                                     | Cell Signaling Technologies | 2232     |
| IkB-alpha                                       | Cell Signaling Technologies | 4812     |
| IRS-1                                           | Cell Signaling Technologies | 2382     |
| IRS-1 P S636/639                                | Cell Signaling Technologies | 2388     |
| MEK1/2                                          | Cell Signaling Technologies | 9122     |
| MEK1/2 P Ser217/221                             | Cell Signaling Technologies | 9154     |
| p21 CIP/WAF1 p Thr145                           | Santa Cruz                  | 20220-R  |
| PKC (pan) P Ser660 (beta-2)                     | Cell Signaling Technologies | 9371     |
| PKC substrate P (R/K)X(S*)(Hyd)(R/k)            | Cell Signaling Technologies | 2261     |
| ATM/ATR Substrate P Ser/Thr                     | Cell Signaling Technologies | 2851     |
| beta-Tubulin                                    | Abcam                       | ab6046   |
| Prohibitin                                      | Santa Cruz                  | sc-28259 |
| p53                                             | Cell Signaling Technologies | 9282     |
| Histone H2A.X P Ser139                          | Millipore (Upstate)         | 05-636   |
| Cyclin D1                                       | Cell Signaling Technologies | 2926     |
| p21 CIP/WAF1                                    | Cell Signaling Technologies | 2946     |

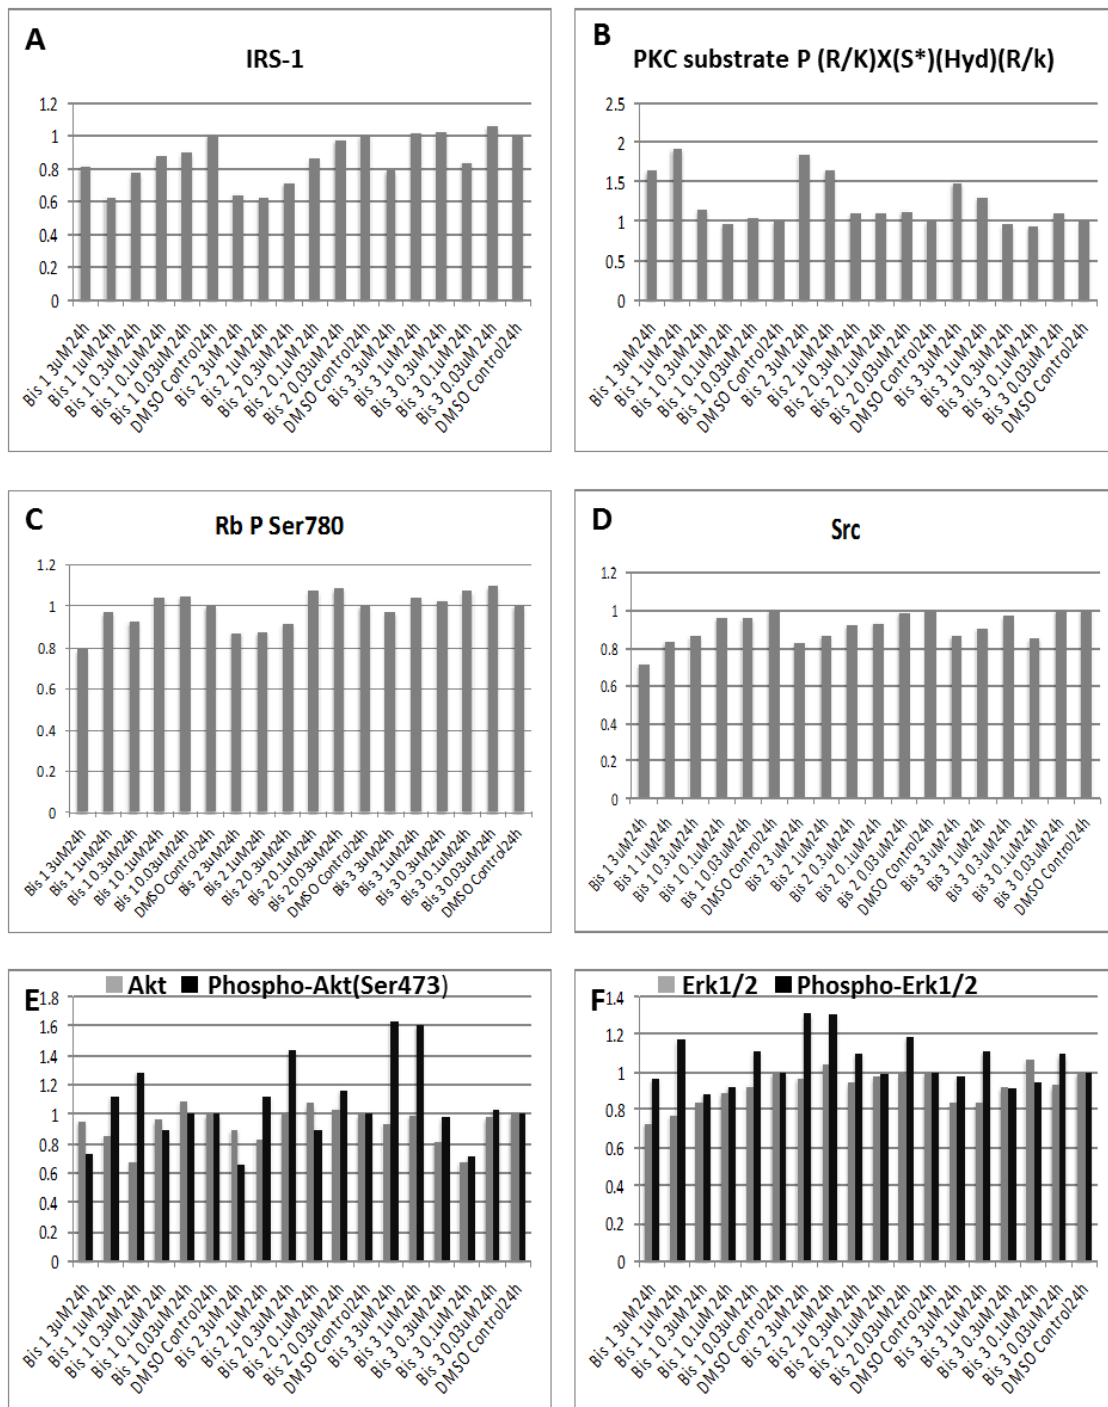

**Figure S2.** Bisebromoamide analogue modulation of intracellular signalling proteins. The mechanism-of-action of Tz-BBA analogues **Bis1-3** at the post translational pathway level was evaluated against a panel of 62 protein and phospho-protein analytes by reverse phase protein array (RPPA). Bar graphs representing analytes exhibiting dose-dependent changes in HCT-116 cell lysates following 24 h exposure to the Tz-BBA analogues include; (A) IRS-1; (B) PKC substrate Phospho (R/K)X(S\*)(Hyd)(R/k) (C) Rb Phospho-Ser780 and (D) Src. In contrast; (E) Akt and Akt Phospho-Ser473 (F) p44/42 MAPK (ERK1/2) and p44/42 MAPK (ERK1/2) Phospho-Thr202/Thr185,Tyr204/Tyr187 show no clear dose-dependent correlation for any of the active Tz-BBA analogues (**Bis1-3**) tested. All data is normalized to DMSO control for each analyte and each time-point (30 min, 3 h 24 h). Only 24 h time point data from selected analogues is shown.

## 1.9 References

- [1] I. Held, P. von den Hoff, D. S. Stephenson, H. Zipse, *Adv. Synth. Catal.* **2008**, *350*, 1891-1900.
- [2] H. J. Johnston, F. S. McWhinnie, F. Landi, A. N. Hulme, *Org. Lett.* **2014**, *16*, 4778-4781.
- [3] D. Georgiev, B. W. H. Saes, H. J. Johnston, S. K. Boys, A. Healy, A. N. Hulme, *Molecules* **2016**, *21*(1), 88.
